# Supplementary material for: A novel method for pH mediated electroflocculation in saltwater systems
Source: Royal Society of Chemistry journal article supplement (doi:10.1039/d5ra07757e), 2026-01-01
Supplement: d5ra07757e1.xlsx [file d5ra07757e1.xlsx]

## Sheet: Summary
N = 3
Temperature Data								pH Data								Compaction Factor Data					Settling Efficiency Data					Dry Weight and Ash Free Dry Weight Data					1 A/L Tests Cell Count Data								1 A/L Biomass Test Data							1 A/L Price Analysis Data
Variable AMP Temperature Averages								Variable AMP pH Averages								Compaction Factor Average					Settling Efficiency Average					10 micrometer filter DW Average						Cell Count		X-mean (forward scatter)		Y-mean (BL3 fluorescent signal - chlororphyll)			AFDW (g/L)		Power Requirement (kWh/kg) Corrected for Harvesting Efficiency		Settling Efficiency
	Cathode			Anode					Cathode			Anode				Time (s)	1 A/L	2 A/L	4 A/L		Time (s)	1 A/L	2 A/L	4 A/L		Time	1 A/L	2 A/L	4 A/L		AFDW	Average	Standard Deviation	Average	Standard Deviation	Average	Standard Deviation		Average	Stdev	Average	Stdev	Average	Stdev		Electricity Price ($/kWh)	0.51 g/L Cost ($/kg)	0.92 g/L Cost ($/kg)	1.69 g/L Cost ($/kg)
Time (s)	1 A/L	2 A/L	4 A/L	1 A/L	2 A/L	4 A/L		Time (s)	1 A/L	2 A/L	4 A/L	1 A/L	2 A/L	4 A/L		0	1	1	1		0	5.8258	4.62242	1.02549		0	0.0111111	0.0333333	0.0222222		Untreated								1.68889	0.083887	3.04255	0.196618	95.6882	1.49391		0	0	0	0
0	23.6	23.6	23.6667	23.5	23.5	23.1333		0	8.16333	8.48333	8.11333	8.33	8.30333	8.30778		300	1	0.0785384	0.158296		300	6.71663	34.3563	82.6698		300	0.0111111	0.1	0.111111		1.69 g/L	50741.1	635.391	218716	967.382	36679	425.867		0.922222	0.0509175	5.86112	0.417825	96.4623	2.21759		0.05	0.323947	0.293056	0.152128
300	23.2	24.2667	26.7	23.0667	23.9667	26.1		300	8.7	9.64667	9.75	2.84667	2.53333	3.77556		600	1	0.123532	0.232793		600	51.1721	92.0412	91.5867		600	0.1	0.155556	0.388889		0.92 g/L	49935.2	1308.01	205861	7428.15	30629.3	233.669		0.511111	0.0509175	6.47894	0.243953	95.4832	1.88436		0.1	0.647894	0.586112	0.304255
600	23.1	24.5333	29.0333	22.9667	24.3	28.2		600	9.40333	9.81333	9.82333	2.48333	2.13	2.68556		1200	0.109381	0.181565	0.328836		1200	80.0245	95.9577	99.2525		1200	0.233333	0.411111	0.966667		0.51 g/L	47678.3	941.49	168178	8995.91	22163	226.325									0.15	0.971841	0.879168	0.456383
1200	23.1	25.2667	32.4667	22.9333	25	31.5333		1200	9.76	9.85	9.79	2.29333	1.93667	2.36667		1800	0.12381	0.256138	0.433492		1800	90.9448	94.2566	99.0969		1800	0.233333	0.344444	0.955556		Treated															0.2	1.29579	1.17222	0.60851
1800	23.0667	25.7333	35	22.9667	25.3333	34		1800	9.82	9.86667	9.78333	2.14667	1.80333	1.98222		2400	0.140266	0.23935	0.37602		2400	93.1556	98.0534	98.9713		2400	0.416667	0.616667	1.16667		1.69 g/L	14666.3	4130.21	340440	13717.2	111377	20146.2									0.25	1.61973	1.46528	0.760638
2400	23.1	26.1667	36.4667	22.9667	25.8667	35.6		2400	9.89667	9.88333	9.84333	2.10333	1.67667	2.01556		Compaction Factor Standard Deviation					Settling Efficiency Standard Deviation					10 micrometer filter DW Standard Deviation					0.92 g/L	4520.63	105.634	449922	12187.9	154775	5987.52									0.3	1.94368	1.75834	0.912766
Variable AMP Temperature Standard Deviations								Variable AMP pH Standard Deviations								Time (s)	1 A/L	2 A/L	4 A/L		Time (s)	1 A/L	2 A/L	4 A/L		Time	1 A/L	2 A/L	4 A/L		0.51 g/L	5088.6	76.7885	434371	10132.3	97505	3078.12
	Cathode			Anode					Cathode			Anode				0	0	0	0		0	9.51898	5.75455	0.993924		0	0.03849	0.0333333	0.03849		Neutralized
Time (s)	1 A/L	2 A/L	4 A/L	1 A/L	2 A/L	4 A/L		Time (s)	1 A/L	2 A/L	4 A/L	1 A/L	2 A/L	4 A/L		300	0	0.00071596	0.0424364		300	9.09191	30.3092	12.2884		300	0.0509175	0.120185	0.07698		1.69 g/L	51754.6	965.834	218601	971.309	36987.3	179.723
0	0.34641	0.556776	0.321455	0.793725	0.5	0.23094		0	0.29023	0.837218	0.247857	0.105357	0.0832666	0.0769078		600	0	0.0216091	0.0682056		600	46.0559	10.0515	6.00399		600	0	0.0693889	0.26736		0.92 g/L	49517.8	562.067	198369	2209.67	30355	349.269
300	0.264575	0.80829	0.424264	0.404145	0.950438	0.282843		300	0.578187	0.338575	0.276225	1.18837	0.794313	0.191176		1200	0.0599129	0.0535126	0.104943		1200	17.3421	4.81769	0.5872		1200	0.120185	0.365655	0.74461		0.51 g/L	47328.5	646.421	149872	451.172	21369.3	350.778
600	0.173205	0.802081	0.750555	0.351188	0.8544	0.34641		600	0.515881	0.304357	0.228108	0.994049	0.814678	0.818809		1800	0.0251976	0.0919234	0.115445		1800	9.26005	3.69886	1.18039		1800	0.152753	0.117063	0.226895
1200	0.173205	0.64291	0.90185	0.11547	0.72111	0.288675		1200	0.28931	0.26	0.147309	1.08076	0.903346	0.800632		2400	0.0267576	0.0728958	0.121417		2400	10.5868	0.433525	0.601111		2400	0.0235702	0.117851	0.0471405
1800	0.11547	0.80829	1.249	0.152753	0.650641	0.608276		1800	0.313209	0.251462	0.100664	1.02276	0.800646	0.518184
2400	0.173205	0.568624	1.36137	0.152753	0.750555	1.01489		2400	0.308275	0.228546	0.104083	0.98475	0.502925	0.599123
																										0.7 micrometer filter DW Average
																										Time	1 A/L	2 A/L	4 A/L
								Average PH Change for 1 A/L tests																		0	0.4	0.4	0.422222
									Cathode		Anode															300	0.422222	0.422222	0.433333
								Time (s)	Average	Standard Deviation	Average	Standard Deviation														600	0.377778	0.488889	0.6
								0	7.98222	0.11619	8.16444	0.19883														1200	0.511111	0.988889	1.73333									.
								300	8.78222	0.325013	2.94778	0.312623														1800	0.666667	1.74444	2.33333
								600	9.34111	0.429108	2.70778	0.260064														2400	0.666667	2.4	2.95
								1200	9.76667	0.120692	2.57	0.495446														0.7 micrometer filter DW Standard Deviation
								1800	9.80778	0.116476	2.47556	0.469681														Time	1 A/L	2 A/L	4 A/L
								2400	9.84556	0.186548	2.47444	0.402036														0	0.176383	0.173205	0.157527
								3600	9.88778	0.100333	2.31722	0.642404														300	0.101835	0.221944	0.120185
																										600	0.171053	0.211695	0.290593
																										1200	0.138778	0.976578	0.75351
																										1800	0.0666667	1.02758	0.737111
																										2400	0.0942809	1.88562	1.1078
																										0.7 micrometer filter AFDW Average
																										Time	1 A/L	2 A/L	4 A/L
																										0	0.433333	0.477778	0.433333
																										300	0.4	0.444444	0.444444
																										600	0.444444	0.466667	0.544444
																										1200	0.5	0.5	1.28889
																										1800	0.566667	0.844444	1.91111
																										2400	0.65	1.18333	2.23333
																										0.7 micrometer filter AFDW Standard Deviation
																										Time	1 A/L	2 A/L	4 A/L
																										0	0.208167	0.226895	0.176383
																										300	0.176383	0.245704	0.138778
																										600	0.195316	0.152753	0.234126
																										1200	0.251661	0.266667	0.943594
																										1800	0.152753	0.254588	0.760361
																										2400	0.164992	0.730677	1.03709

## Sheet: Electricity Use
Electricity Use Averages: N = 3								Standard Deviation
		1 A/L		2 A/L		4 A/L		1 A/L		2 A/L		4 A/L
Volume (L)	Time (s)	Current (A)	Potential (V)	Current (A)	Potential (V)	Current (A)	Potential (V)	Current (A)	Potential (V)	Current (A)	Potential (V)	Current (A)	Potential (V)
0.49	0	0.4	5.66667	1.23333	14.6667	1.9	19.9667	0	1.20139	0.57735	4.54569	0	0.702377
0.49	3	0.4	6.03333	1.23333	14.6667	1.9	20.0333	0	0.90185	0.57735	4.54569	0	0.70946
0.49	6	0.4	6.2	1.26667	14.7333	1.9	20.0333	0	0.818535	0.635085	4.48813	0	0.80829
0.49	9	0.4	6.3	1.26667	14.7	1.9	20.0667	0	0.793725	0.635085	4.51331	0	0.763763
0.49	12	0.4	6.43333	1.26667	14.7	1.9	20.0333	0	0.723418	0.635085	4.51331	0	0.70946
0.49	15	0.4	6.46667	1.26667	14.7	1.9	20.0333	0	0.665833	0.635085	4.51331	0	0.70946
0.49	18	0.4	6.53333	0.9	11.7333	1.9	20	0	0.550757	0	0.702377	0	0.754983
0.49	21	0.4	6.6	0.9	11.7333	1.9	20	0	0.519615	0	0.702377	0	0.754983
0.49	24	0.4	6.63333	0.9	11.7333	1.9	20	0	0.46188	0	0.702377	0	0.754983
0.49	27	0.4	6.7	0.9	11.7333	1.9	20	0	0.34641	0	0.702377	0	0.754983
0.49	30	0.4	6.73333	0.9	11.7333	1.9	20	0	0.288675	0	0.702377	0	0.754983
0.49	33	0.4	6.76667	0.9	11.7333	1.9	20	0	0.23094	0	0.702377	0	0.754983
0.49	36	0.4	6.8	0.9	11.7	1.9	20	0	0.173205	0	0.655744	0	0.754983
0.49	39	0.4	6.8	0.9	11.7	1.9	20	0	0.173205	0	0.655744	0	0.754983
0.49	42	0.4	6.86667	0.9	11.7	1.9	20	0	0.057735	0	0.655744	0	0.754983
0.49	45	0.4	6.86667	0.9	11.7	1.9	19.9667	0	0.057735	0	0.655744	0	0.702377
0.49	48	0.4	6.9	0.9	11.7	1.9	19.9667	0	0	0	0.655744	0	0.702377
0.49	51	0.4	6.9	0.9	11.7	1.9	19.9667	0	0	0	0.655744	0	0.702377
0.49	54	0.4	6.9	0.9	11.7	1.9	19.9667	0	0	0	0.655744	0	0.702377
0.49	57	0.4	6.93333	0.9	11.7	1.9	19.9333	0	0.057735	0	0.655744	0	0.650641
0.49	60	0.4	6.96667	0.9	11.7	1.9	19.9	0	0.057735	0	0.655744	0	0.7
0.49	63	0.4	6.96667	0.9	11.7	1.9	19.9333	0	0.057735	0	0.655744	0	0.650641
0.49	66	0.4	6.93333	0.9	11.7	1.9	19.9	0	0.057735	0	0.655744	0	0.7
0.49	69	0.4	6.93333	0.9	11.7	1.9	19.9	0	0.057735	0	0.655744	0	0.7
0.49	72	0.4	6.96667	0.9	11.7	1.9	19.8667	0	0.057735	0	0.655744	0	0.650641
0.49	75	0.4	7	0.9	11.7	1.9	19.8667	0	0	0	0.655744	0	0.650641
0.49	78	0.4	6.96667	0.9	11.7	1.9	19.8667	0	0.057735	0	0.655744	0	0.650641
0.49	81	0.4	6.96667	0.9	11.7	1.9	19.8333	0	0.057735	0	0.655744	0	0.602771
0.49	84	0.4	6.96667	0.9	11.7	1.9	19.8333	0	0.057735	0	0.655744	0	0.602771
0.49	87	0.4	6.96667	0.9	11.7	1.9	19.8333	0	0.057735	0	0.655744	0	0.602771
0.49	90	0.4	6.96667	0.9	11.7	1.9	19.8	0	0.057735	0	0.655744	0	0.556776
0.49	93	0.4	6.96667	0.9	11.7	1.9	19.8	0	0.057735	0	0.655744	0	0.556776
0.49	96	0.4	6.96667	0.9	11.7	1.9	19.7667	0	0.057735	0	0.655744	0	0.61101
0.49	99	0.4	6.96667	0.9	11.7	1.9	19.7667	0	0.057735	0	0.655744	0	0.51316
0.49	102	0.4	6.96667	0.9	11.6667	1.9	19.7667	0	0.057735	0	0.650641	0	0.51316
0.49	105	0.4	6.96667	0.9	11.7	1.9	19.7333	0	0.057735	0	0.655744	0	0.568624
0.49	108	0.4	6.96667	0.9	11.6333	1.9	19.7	0	0.057735	0	0.602771	0	0.52915
0.49	111	0.4	6.93333	0.9	11.6333	1.9	19.7333	0	0.057735	0	0.602771	0	0.568624
0.49	114	0.4	6.93333	0.9	11.6667	1.9	19.7	0	0.057735	0	0.650641	0	0.52915
0.49	117	0.4	6.93333	0.9	11.6667	1.9	19.7	0	0.057735	0	0.650641	0	0.52915
0.49	120	0.4	6.93333	0.9	11.6667	1.9	19.7	0	0.057735	0	0.650641	0	0.52915
0.49	123	0.4	6.93333	0.9	11.6333	1.9	19.7	0	0.057735	0	0.602771	0	0.52915
0.49	126	0.4	6.93333	0.9	11.6333	1.9	19.6333	0	0.057735	0	0.602771	0	0.550757
0.49	129	0.4	6.93333	0.9	11.6333	1.9	19.6333	0	0.057735	0	0.602771	0	0.550757
0.49	132	0.4	6.96667	0.9	11.6333	1.9	19.6333	0	0.057735	0	0.602771	0	0.550757
0.49	135	0.4	6.93333	0.9	11.6333	1.9	19.6333	0	0.057735	0	0.602771	0	0.550757
0.49	138	0.4	6.93333	0.9	11.6333	1.9	19.6	0	0.057735	0	0.602771	0	0.519615
0.49	141	0.4	6.96667	0.9	11.6333	1.9	19.6	0	0.057735	0	0.602771	0	0.519615
0.49	144	0.4	6.93333	0.9	11.6333	1.9	19.6	0	0.057735	0	0.602771	0	0.519615
0.49	147	0.4	6.93333	0.9	11.6333	1.9	19.5667	0	0.057735	0	0.602771	0	0.493288
0.49	150	0.4	6.96667	0.9	11.6333	1.9	19.5667	0	0.057735	0	0.602771	0	0.493288
0.49	153	0.4	6.93333	0.9	11.6333	1.9	19.5333	0	0.057735	0	0.602771	0	0.472582
0.49	156	0.4	6.96667	0.9	11.6333	1.9	19.5333	0	0.057735	0	0.602771	0	0.472582
0.49	159	0.4	6.93333	0.9	11.6333	1.9	19.5333	0	0.057735	0	0.602771	0	0.472582
0.49	162	0.4	6.96667	0.9	11.6333	1.9	19.5333	0	0.057735	0	0.602771	0	0.472582
0.49	165	0.4	6.93333	0.9	11.6333	1.9	19.5	0	0.057735	0	0.602771	0	0.458258
0.49	168	0.4	6.93333	0.9	11.6	1.9	19.5	0	0.057735	0	0.6	0	0.458258
0.49	171	0.4	6.93333	0.9	11.6333	1.9	19.5	0	0.057735	0	0.602771	0	0.458258
0.49	174	0.4	6.93333	0.9	11.6333	1.9	19.5	0	0.057735	0	0.602771	0	0.458258
0.49	177	0.4	6.96667	0.9	11.6	1.9	19.4667	0	0.057735	0	0.6	0	0.51316
0.49	180	0.4	6.93333	0.9	11.6333	1.9	19.4333	0	0.057735	0	0.602771	0	0.503322
0.49	183	0.4	6.96667	0.9	11.6333	1.9	19.4333	0	0.057735	0	0.602771	0	0.503322
0.49	186	0.4	6.93333	0.9	11.6333	1.9	19.4333	0	0.057735	0	0.602771	0	0.503322
0.49	189	0.4	6.96667	0.9	11.6	1.9	19.4333	0	0.057735	0	0.655744	0	0.503322
0.49	192	0.4	6.96667	0.9	11.6	1.9	19.4333	0	0.057735	0	0.6	0	0.503322
0.49	195	0.4	6.93333	0.9	11.6	1.9	19.4	0	0.057735	0	0.6	0	0.458258
0.49	198	0.4	6.96667	0.9	11.6	1.9	19.3667	0	0.057735	0	0.6	0	0.450925
0.49	201	0.4	6.93333	0.9	11.6	1.9	19.3667	0	0.057735	0	0.6	0	0.450925
0.49	204	0.4	6.96667	0.9	11.6	1.9	19.3667	0	0.057735	0	0.6	0	0.450925
0.49	207	0.4	6.96667	0.9	11.5333	1.9	19.3667	0	0.057735	0	0.602771	0	0.450925
0.49	210	0.4	6.96667	0.9	11.5667	1.9	19.3667	0	0.057735	0	0.650641	0	0.450925
0.49	213	0.4	6.93333	0.9	11.5333	1.9	19.3667	0	0.057735	0	0.602771	0	0.450925
0.49	216	0.4	6.93333	0.9	11.5333	1.9	19.3667	0	0.057735	0	0.602771	0	0.450925
0.49	219	0.4	6.93333	0.9	11.5333	1.9	19.3667	0	0.057735	0	0.602771	0	0.450925
0.49	222	0.4	6.96667	0.9	11.5333	1.9	19.2667	0	0.057735	0	0.602771	0	0.450925
0.49	225	0.4	6.96667	0.9	11.5333	1.9	19.2667	0	0.057735	0	0.602771	0	0.450925
0.49	228	0.4	6.96667	0.9	11.5333	1.9	19.2667	0	0.057735	0	0.602771	0	0.450925
0.49	231	0.4	6.96667	0.9	11.5333	1.9	19.2667	0	0.057735	0	0.602771	0	0.450925
0.49	234	0.4	6.93333	0.9	11.5333	1.9	19.2667	0	0.11547	0	0.602771	0	0.450925
0.49	237	0.4	6.96667	0.9	11.5333	1.9	19.2667	0	0.057735	0	0.602771	0	0.450925
0.49	240	0.4	6.96667	0.9	11.5333	1.9	19.2333	0	0.057735	0	0.602771	0	0.404145
0.49	243	0.4	6.96667	0.9	11.5333	1.9	19.2333	0	0.057735	0	0.602771	0	0.404145
0.49	246	0.4	6.96667	0.9	11.5333	1.9	19.2333	0	0.057735	0	0.602771	0	0.404145
0.49	249	0.4	6.96667	0.9	11.5333	1.9	19.2333	0	0.057735	0	0.602771	0	0.404145
0.49	252	0.4	6.93333	0.9	11.5333	1.9	19.1667	0	0.057735	0	0.602771	0	0.450925
0.49	255	0.4	6.96667	0.9	11.5333	1.9	19.4333	0	0.057735	0	0.602771	0	0.568624
0.49	258	0.4	6.96667	0.9	11.5	1.9	19.2	0	0.057735	0	0.556776	0	0.458258
0.49	261	0.4	6.96667	0.9	11.4667	1.76667	20.8667	0	0.057735	0	0.550757	0.23094	3.00721
0.49	264	0.4	6.96667	0.9	11.4667	1.9	19.1333	0	0.057735	0	0.550757	0	0.450925
0.49	267	0.4	6.93333	0.9	11.4667	1.9	19.1667	0	0.057735	0	0.550757	0	0.450925
0.49	270	0.4	6.96667	0.9	11.4667	1.9	19.1333	0	0.057735	0	0.550757	0	0.450925
0.49	273	0.4	6.96667	0.9	11.4667	1.9	19.1333	0	0.057735	0	0.550757	0	0.450925
0.49	276	0.4	6.96667	0.9	11.5	1.9	19.1	0	0.057735	0	0.556776	0	0.4
0.49	279	0.4	6.96667	0.9	11.4667	1.9	19.1	0	0.057735	0	0.550757	0	0.4
0.49	282	0.4	6.96667	0.9	11.4667	1.9	19.1	0	0.057735	0	0.550757	0	0.4
0.49	285	0.4	6.96667	0.9	11.4667	1.9	19.0667	0	0.057735	0	0.550757	0	0.450925
0.49	288	0.4	6.96667	0.9	11.4667	1.9	19.0667	0	0.057735	0	0.550757	0	0.450925
0.49	291	0.4	6.96667	0.9	11.4667	1.9	19.1667	0	0.057735	0	0.550757	0	0.305505
0.49	294	0.4	6.96667	0.9	11.4667	1.9	19.2	0	0.057735	0	0.550757	0	0.264575
0.49	297	0.4	6.96667	0.9	11.5333	1.9	19.2	0	0.057735	0	0.650641	0	0.264575
0.49	300	0.4	6.93333	0.9	11.5667	1.9	19.2	0	0.057735	0	0.602771	0	0.264575
0.48	303	0.4	6.96667	0.9	11.6	1.9	19.1667	0	0.057735	0	0.556776	0	0.288675
0.48	306	0.4	7	0.9	11.6	1.9	19.1667	0	0.1	0	0.556776	0	0.288675
0.48	309	0.4	7.03333	0.9	11.6	1.9	19.1333	0	0.057735	0	0.556776	0	0.23094
0.48	312	0.4	7.03333	0.9	11.6	1.9	19.1667	0	0.057735	0	0.556776	0	0.208167
0.48	315	0.4	7.03333	0.9	11.6	1.9	19.2333	0	0.057735	0	0.556776	0	0.208167
0.48	318	0.4	7.03333	0.9	11.6	1.9	19.2	0	0.057735	0	0.556776	0	0.264575
0.48	321	0.4	7.03333	0.9	11.5667	1.9	19.2333	0	0.057735	0	0.568624	0	0.208167
0.48	324	0.4	7.03333	0.9	11.6	1.9	19.2	0	0.057735	0	0.556776	0	0.264575
0.48	327	0.4	7.03333	0.9	11.6	1.9	19.2	0	0.057735	0	0.556776	0	0.264575
0.48	330	0.4	7.03333	0.9	11.6	1.9	19.2	0	0.057735	0	0.556776	0	0.264575
0.48	333	0.4	7.03333	0.9	11.5667	1.9	19.2	0	0.057735	0	0.568624	0	0.264575
0.48	336	0.4	7.03333	0.9	11.6	1.9	19.1667	0	0.057735	0	0.556776	0	0.23094
0.48	339	0.4	7.03333	0.9	11.5667	1.9	18.7	0	0.057735	0	0.568624	0	0.72111
0.48	342	0.4	7.03333	0.9	11.5667	1.9	19.2	0	0.057735	0	0.568624	0	0.264575
0.48	345	0.4	7.03333	0.9	11.5667	1.9	19.3333	0	0.057735	0	0.568624	0	0.450925
0.48	348	0.4	7.03333	0.9	11.5667	1.93333	19.3333	0	0.057735	0	0.568624	0.057735	0.450925
0.48	351	0.4	7.03333	0.9	11.5667	1.9	19.1333	0	0.057735	0	0.568624	0	0.208167
0.48	354	0.4	7.03333	0.9	11.6	1.9	19.2333	0	0.057735	0	0.556776	0	0.305505
0.48	357	0.4	7.03333	0.9	11.6	1.9	19.1667	0	0.057735	0	0.556776	0	0.251661
0.48	360	0.4	7.03333	0.9	11.5667	1.9	19.1667	0	0.057735	0	0.568624	0	0.351188
0.48	363	0.4	7.06667	0.9	11.5667	1.9	19.2	0	0.11547	0	0.568624	0	0.3
0.48	366	0.4	7.06667	0.9	11.5667	1.9	19.1333	0	0.11547	0	0.568624	0	0.305505
0.48	369	0.4	7.06667	0.9	11.5667	1.9	19.1333	0	0.11547	0	0.568624	0	0.305505
0.48	372	0.4	7.06667	0.9	11.5667	1.9	19.1333	0	0.11547	0	0.568624	0	0.305505
0.48	375	0.4	7.06667	0.9	11.5333	1.9	19.1333	0	0.11547	0	0.61101	0	0.305505
0.48	378	0.4	7.06667	0.9	11.5667	1.9	19.1333	0	0.11547	0	0.568624	0	0.305505
0.48	381	0.4	7.06667	0.9	11.5333	1.9	19.1333	0	0.11547	0	0.61101	0	0.305505
0.48	384	0.4	7.06667	0.9	11.5333	1.9	19.1333	0	0.11547	0	0.61101	0	0.305505
0.48	387	0.4	7.06667	0.9	11.5667	1.9	19.1333	0	0.11547	0	0.568624	0	0.305505
0.48	390	0.4	7.06667	0.9	11.5333	1.9	19.0667	0	0.11547	0	0.61101	0	0.251661
0.48	393	0.4	7.06667	0.9	11.5333	1.9	19.0333	0	0.11547	0	0.61101	0	0.305505
0.48	396	0.4	7.06667	0.9	11.5333	1.9	19.1	0	0.11547	0	0.61101	0	0.264575
0.48	399	0.4	7.06667	0.9	11.5333	1.9	19.0333	0	0.11547	0	0.61101	0	0.305505
0.48	402	0.4	7.06667	0.9	11.5333	1.9	19.0333	0	0.11547	0	0.61101	0	0.305505
0.48	405	0.4	7.06667	0.9	11.5333	1.9	19.0333	0	0.11547	0	0.61101	0	0.305505
0.48	408	0.4	7.06667	0.9	11.5333	1.9	19.0333	0	0.11547	0	0.61101	0	0.305505
0.48	411	0.4	7.06667	0.9	11.5333	1.9	19.0333	0	0.11547	0	0.61101	0	0.305505
0.48	414	0.4	7.06667	0.9	11.5333	1.9	19.0333	0	0.11547	0	0.61101	0	0.305505
0.48	417	0.4	7.06667	0.9	11.5333	1.9	19	0	0.11547	0	0.61101	0	0.3
0.48	420	0.4	7.06667	0.9	11.5333	1.9	19	0	0.11547	0	0.61101	0	0.3
0.48	423	0.4	7.06667	0.9	11.5333	1.9	19	0	0.11547	0	0.61101	0	0.3
0.48	426	0.4	7.06667	0.9	11.5333	1.9	19.0333	0	0.11547	0	0.61101	0	0.305505
0.48	429	0.4	7.06667	0.9	11.5333	1.9	19	0	0.11547	0	0.61101	0	0.360555
0.48	432	0.4	7.06667	0.9	11.5333	1.9	18.9667	0	0.11547	0	0.61101	0	0.351188
0.48	435	0.4	7.06667	0.9	11.5333	1.9	18.9667	0	0.11547	0	0.61101	0	0.351188
0.48	438	0.4	7.06667	0.9	11.5333	1.9	18.9667	0	0.11547	0	0.61101	0	0.351188
0.48	441	0.4	7.06667	0.9	11.5	1.9	18.9333	0	0.11547	0	0.6245	0	0.305505
0.48	444	0.4	7.06667	0.9	11.5	1.9	18.9333	0	0.11547	0	0.6245	0	0.305505
0.48	447	0.4	7.06667	0.9	11.5	1.9	18.9333	0	0.11547	0	0.6245	0	0.305505
0.48	450	0.4	7.06667	0.9	11.5	1.9	18.9333	0	0.11547	0	0.6245	0	0.305505
0.48	453	0.4	7.06667	0.9	11.5	1.9	18.9333	0	0.11547	0	0.6245	0	0.305505
0.48	456	0.4	7.06667	0.9	11.5	1.9	18.9333	0	0.11547	0	0.6245	0	0.305505
0.48	459	0.4	7.06667	0.9	11.5	1.9	18.9333	0	0.11547	0	0.6245	0	0.305505
0.48	462	0.4	7.06667	0.9	11.5	1.9	18.9333	0	0.11547	0	0.6245	0	0.305505
0.48	465	0.4	7.06667	0.9	11.6	1.9	18.9333	0	0.11547	0	0.6	0	0.305505
0.48	468	0.4	7.06667	0.9	11.5667	1.9	18.9333	0	0.11547	0	0.602771	0	0.305505
0.48	471	0.4	7.06667	0.9	11.5667	1.9	18.9333	0	0.11547	0	0.602771	0	0.305505
0.48	474	0.4	7.06667	0.9	11.5667	1.9	18.9333	0	0.11547	0	0.602771	0	0.305505
0.48	477	0.4	7.06667	0.9	11.5667	1.9	18.9333	0	0.11547	0	0.602771	0	0.305505
0.48	480	0.4	7.06667	0.9	11.5667	1.9	18.9333	0	0.11547	0	0.602771	0	0.305505
0.48	483	0.4	7.06667	0.9	11.5667	1.9	18.9333	0	0.11547	0	0.602771	0	0.305505
0.48	486	0.4	7.06667	0.9	11.5667	1.9	18.9333	0	0.11547	0	0.602771	0	0.305505
0.48	489	0.4	7.06667	0.9	11.5667	1.9	18.9	0	0.11547	0	0.602771	0	0.360555
0.48	492	0.4	7.06667	0.9	11.5667	1.9	18.9333	0	0.11547	0	0.602771	0	0.305505
0.48	495	0.4	7.06667	0.9	11.5667	1.9	18.9	0	0.11547	0	0.602771	0	0.360555
0.48	498	0.4	7.06667	0.9	11.5667	1.9	18.9	0	0.11547	0	0.602771	0	0.360555
0.48	501	0.4	7.06667	0.9	11.5667	1.9	18.8667	0	0.11547	0	0.602771	0	0.321455
0.48	504	0.4	7.06667	0.9	11.5667	1.9	18.8667	0	0.11547	0	0.602771	0	0.321455
0.48	507	0.4	7.06667	0.9	11.5333	1.9	18.9	0	0.11547	0	0.550757	0	0.360555
0.48	510	0.4	7.06667	0.9	11.5333	1.9	18.8667	0	0.11547	0	0.550757	0	0.321455
0.48	513	0.4	7.06667	0.9	11.5333	1.9	18.8667	0	0.11547	0	0.550757	0	0.321455
0.48	516	0.4	7.06667	0.9	11.5333	1.9	18.8667	0	0.11547	0	0.550757	0	0.321455
0.48	519	0.4	7.06667	0.9	11.5333	1.9	18.8667	0	0.11547	0	0.550757	0	0.321455
0.48	522	0.4	7.06667	0.9	11.5	1.9	18.8667	0	0.11547	0	0.6	0	0.321455
0.48	525	0.4	7.06667	0.9	11.5333	1.9	18.8667	0	0.11547	0	0.550757	0	0.321455
0.48	528	0.4	7.06667	0.9	11.7333	1.9	18.8667	0	0.11547	0	0.971253	0	0.321455
0.48	531	0.4	7.06667	0.9	11.4667	1.9	18.8333	0	0.11547	0	0.550757	0	0.378594
0.48	534	0.4	7.06667	0.8	12.8333	1.9	18.8	0	0.11547	0.173205	2.84488	0	0.360555
0.48	537	0.4	7.06667	0.933333	12.1667	1.9	19	0	0.11547	0.057735	1.70098	0	0.556776
0.48	540	0.4	7.06667	0.9	11.5333	1.9	18.8	0	0.11547	0	0.650641	0	0.360555
0.48	543	0.4	7.06667	0.9	11.4667	1.93333	19.4333	0	0.11547	0	0.550757	0.057735	1.23423
0.48	546	0.4	7.06667	0.9	11.4667	1.9	20.4	0	0.11547	0	0.550757	0	2.87924
0.48	549	0.4	7.06667	0.9	11.4667	1.9	18.8	0	0.11547	0	0.550757	0	0.360555
0.48	552	0.4	7.06667	0.9	11.4667	1.9	18.7667	0	0.11547	0	0.550757	0	0.351188
0.48	555	0.4	7.06667	0.9	11.4667	1.9	18.6667	0	0.11547	0	0.550757	0	0.23094
0.48	558	0.4	7.06667	0.9	11.4667	1.9	18.8	0	0.11547	0	0.550757	0	0.34641
0.48	561	0.4	7.06667	0.9	11.5	1.9	18.8	0	0.11547	0	0.5	0	0.34641
0.48	564	0.4	7.06667	0.9	11.4667	1.9	18.7667	0	0.11547	0	0.550757	0	0.321455
0.48	567	0.4	7.06667	0.9	11.4667	1.8	18.9	0	0.11547	0	0.550757	0.173205	0.458258
0.48	570	0.4	7.06667	0.9	11.4667	1.9	18.8667	0	0.11547	0	0.550757	0	0.416333
0.48	573	0.4	7.06667	0.9	11.5	1.9	18.8667	0	0.11547	0	0.5	0	0.416333
0.48	576	0.4	7.06667	0.9	11.5	1.9	18.9333	0	0.11547	0	0.5	0	0.602771
0.48	579	0.4	7.06667	0.9	11.5667	1.9	18.9667	0	0.11547	0	0.602771	0	0.550757
0.48	582	0.4	7.06667	0.9	11.5333	1.9	18.9333	0	0.11547	0	0.650641	0	0.602771
0.48	585	0.4	7.06667	0.9	11.5667	1.9	18.9333	0	0.11547	0	0.602771	0	0.602771
0.48	588	0.4	7.06667	0.9	11.5333	1.9	18.9	0	0.11547	0	0.650641	0	0.6
0.48	591	0.4	7.06667	0.9	11.5333	1.9	18.9	0	0.11547	0	0.650641	0	0.6
0.48	594	0.4	7.06667	0.9	11.5333	1.9	18.9333	0	0.11547	0	0.650641	0	0.602771
0.48	597	0.4	7.06667	0.9	11.5333	1.9	18.9	0	0.11547	0	0.650641	0	0.6
0.48	600	0.4	7.06667	0.9	11.5333	1.9	18.8667	0	0.11547	0	0.650641	0	0.550757
0.47	603	0.4	7.06667	0.9	11.5333	1.9	18.8667	0	0.11547	0	0.650641	0	0.550757
0.47	606	0.4	7.1	0.9	11.5667	1.9	18.8667	0	0.1	0	0.602771	0	0.550757
0.47	609	0.4	7.13333	0.9	11.6	1.9	18.8667	0	0.11547	0	0.556776	0	0.550757
0.47	612	0.4	7.03333	0.9	11.6	1.9	18.8667	0	0.057735	0	0.556776	0	0.550757
0.47	615	0.4	7.1	0.9	11.6	1.9	18.9333	0	0.1	0	0.556776	0	0.450925
0.47	618	0.4	7.16667	0.9	11.6	1.9	19	0	0.152753	0	0.556776	0	0.360555
0.47	621	0.4	7.16667	0.9	11.6	1.9	18.9667	0	0.152753	0	0.556776	0	0.404145
0.47	624	0.4	7.16667	0.9	11.6	1.9	18.9667	0	0.152753	0	0.556776	0	0.404145
0.47	627	0.4	7.16667	0.9	11.6	1.9	18.9667	0	0.152753	0	0.556776	0	0.404145
0.47	630	0.4	7.16667	0.9	11.6	1.9	18.9667	0	0.152753	0	0.556776	0	0.404145
0.47	633	0.4	7.13333	0.9	11.7333	1.9	18.9667	0	0.152753	0	0.568624	0	0.404145
0.47	636	0.4	7.16667	0.9	11.6	1.9	18.9333	0	0.152753	0	0.556776	0	0.351188
0.47	639	0.4	7.16667	0.9	11.6	1.9	18.9333	0	0.152753	0	0.556776	0	0.416333
0.47	642	0.4	7.16667	0.9	11.6	1.9	18.9	0	0.152753	0	0.556776	0	0.360555
0.47	645	0.4	7.16667	0.9	11.6667	1.9	18.9	0	0.152753	0	0.550757	0	0.360555
0.47	648	0.4	7.16667	0.9	11.6667	1.9	18.9	0	0.152753	0	0.550757	0	0.360555
0.47	651	0.4	7.16667	0.9	11.6667	1.9	18.9	0	0.152753	0	0.550757	0	0.360555
0.47	654	0.4	7.16667	0.9	11.6667	1.9	18.9	0	0.152753	0	0.550757	0	0.360555
0.47	657	0.4	7.16667	0.9	11.6	1.9	18.9	0	0.152753	0	0.556776	0	0.360555
0.47	660	0.4	7.16667	0.9	11.6333	1.9	18.9	0	0.152753	0	0.550757	0	0.360555
0.47	663	0.4	7.16667	0.9	11.6333	1.9	18.9333	0	0.152753	0	0.550757	0	0.351188
0.47	666	0.4	7.2	0.9	11.6333	1.9	19	0	0.2	0	0.550757	0	0.360555
0.47	669	0.4	7.16667	0.9	11.6333	1.9	19	0	0.152753	0	0.550757	0	0.360555
0.47	672	0.4	7.2	0.9	11.6333	1.9	18.9667	0	0.2	0	0.550757	0	0.416333
0.47	675	0.4	7.2	0.9	11.6333	1.9	19	0	0.2	0	0.550757	0	0.360555
0.47	678	0.4	7.2	0.9	11.6333	1.9	19	0	0.2	0	0.550757	0	0.360555
0.47	681	0.4	7.16667	0.9	11.6333	1.9	19	0	0.152753	0	0.550757	0	0.360555
0.47	684	0.4	7.2	0.9	11.6333	1.9	18.9667	0	0.2	0	0.550757	0	0.416333
0.47	687	0.4	7.2	0.9	11.6333	1.9	18.9667	0	0.2	0	0.550757	0	0.416333
0.47	690	0.4	7.2	0.9	11.6333	1.9	18.9	0	0.2	0	0.550757	0	0.360555
0.47	693	0.4	7.2	0.9	11.6333	1.9	18.9667	0	0.2	0	0.550757	0	0.416333
0.47	696	0.4	7.2	0.9	11.6333	1.9	18.9333	0	0.2	0	0.550757	0	0.378594
0.47	699	0.4	7.16667	0.9	11.6333	1.9	18.9	0	0.152753	0	0.550757	0	0.360555
0.47	702	0.4	7.2	0.9	11.6333	1.9	18.9	0	0.2	0	0.550757	0	0.360555
0.47	705	0.4	7.2	0.9	11.6333	1.9	18.9	0	0.2	0	0.550757	0	0.360555
0.47	708	0.4	7.16667	0.9	11.6333	1.9	18.9	0	0.152753	0	0.550757	0	0.360555
0.47	711	0.4	7.2	0.9	11.6333	1.9	18.9	0	0.2	0	0.550757	0	0.360555
0.47	714	0.4	7.2	0.9	11.6333	1.9	18.9	0	0.2	0	0.550757	0	0.360555
0.47	717	0.4	7.2	0.9	11.6333	1.9	18.9	0	0.2	0	0.550757	0	0.360555
0.47	720	0.4	7.2	0.9	11.6333	1.9	18.9	0	0.2	0	0.550757	0	0.360555
0.47	723	0.4	7.2	0.9	11.6333	1.9	18.9	0	0.2	0	0.550757	0	0.360555
0.47	726	0.4	7.2	0.9	11.6333	1.9	18.9	0	0.2	0	0.550757	0	0.360555
0.47	729	0.4	7.2	0.9	11.6333	1.9	18.9	0	0.2	0	0.550757	0	0.360555
0.47	732	0.4	7.2	0.9	11.6333	1.9	18.9	0	0.2	0	0.550757	0	0.360555
0.47	735	0.4	7.2	0.9	11.6333	1.9	18.9	0	0.2	0	0.550757	0	0.360555
0.47	738	0.4	7.2	0.9	11.6333	1.9	18.8667	0	0.2	0	0.550757	0	0.321455
0.47	741	0.4	7.2	0.9	11.6333	1.9	18.9	0	0.2	0	0.550757	0	0.360555
0.47	744	0.4	7.2	0.9	11.6333	1.9	18.8333	0	0.2	0	0.550757	0	0.378594
0.47	747	0.4	7.2	0.9	11.6333	1.9	18.8667	0	0.2	0	0.550757	0	0.416333
0.47	750	0.4	7.2	0.9	11.6333	1.9	18.8667	0	0.2	0	0.550757	0	0.416333
0.47	753	0.4	7.2	0.9	11.6333	1.9	18.8667	0	0.2	0	0.550757	0	0.416333
0.47	756	0.4	7.2	0.9	11.6333	1.9	18.8667	0	0.2	0	0.550757	0	0.416333
0.47	759	0.4	7.2	0.9	11.6333	1.9	18.8667	0	0.2	0	0.550757	0	0.416333
0.47	762	0.4	7.2	0.9	11.6333	1.9	18.8667	0	0.2	0	0.550757	0	0.416333
0.47	765	0.4	7.2	0.9	11.6333	1.9	18.8667	0	0.2	0	0.550757	0	0.416333
0.47	768	0.4	7.2	0.9	11.6333	1.9	18.8667	0	0.2	0	0.550757	0	0.416333
0.47	771	0.4	7.2	0.9	11.6333	1.9	18.8667	0	0.2	0	0.550757	0	0.416333
0.47	774	0.4	7.2	0.9	11.6333	1.9	18.8667	0	0.2	0	0.550757	0	0.416333
0.47	777	0.4	7.2	0.9	11.6	1.9	18.8667	0	0.2	0	0.6	0	0.416333
0.47	780	0.4	7.2	0.9	11.6	1.9	18.8667	0	0.2	0	0.6	0	0.416333
0.47	783	0.4	7.2	0.9	11.6	1.9	18.8333	0	0.2	0	0.6	0	0.472582
0.47	786	0.4	7.2	0.9	11.6	1.9	18.8333	0	0.2	0	0.6	0	0.472582
0.47	789	0.4	7.2	0.9	11.6	1.9	18.8333	0	0.2	0	0.6	0	0.472582
0.47	792	0.4	7.2	0.9	11.6	1.9	18.8333	0	0.2	0	0.6	0	0.472582
0.47	795	0.4	7.2	0.9	11.6	1.9	18.8333	0	0.2	0	0.6	0	0.472582
0.47	798	0.4	7.2	0.9	11.6	1.9	18.8333	0	0.2	0	0.6	0	0.472582
0.47	801	0.4	7.2	0.9	11.5667	1.9	18.8333	0	0.2	0	0.550757	0	0.472582
0.47	804	0.4	7.2	0.9	11.5667	1.9	18.8333	0	0.2	0	0.550757	0	0.472582
0.47	807	0.4	7.2	0.9	11.5667	1.9	18.8	0	0.2	0	0.550757	0	0.43589
0.47	810	0.4	7.2	0.9	11.5667	1.9	18.8	0	0.2	0	0.550757	0	0.43589
0.47	813	0.4	7.2	0.9	11.5667	1.9	18.8	0	0.2	0	0.550757	0	0.43589
0.47	816	0.4	7.2	0.9	11.5667	1.9	18.8	0	0.2	0	0.550757	0	0.43589
0.47	819	0.4	7.2	0.9	11.5667	1.9	18.8	0	0.2	0	0.550757	0	0.43589
0.47	822	0.4	7.2	0.9	11.5667	1.9	18.8	0	0.2	0	0.550757	0	0.43589
0.47	825	0.4	7.2	0.9	11.5667	1.9	18.8	0	0.2	0	0.550757	0	0.43589
0.47	828	0.4	7.2	0.9	11.5667	1.9	18.7667	0	0.2	0	0.550757	0	0.493288
0.47	831	0.4	7.2	0.9	11.5667	1.9	18.8	0	0.2	0	0.550757	0	0.43589
0.47	834	0.4	7.2	0.9	11.5667	1.9	18.8	0	0.2	0	0.550757	0	0.43589
0.47	837	0.4	7.2	0.9	11.5667	1.9	18.7667	0	0.2	0	0.550757	0	0.493288
0.47	840	0.4	7.2	0.9	11.5667	1.9	18.7333	0	0.2	0	0.550757	0	0.472582
0.47	843	0.4	7.2	0.9	11.5333	1.9	18.7667	0	0.2	0	0.503322	0	0.493288
0.47	846	0.4	7.2	0.9	11.5333	1.9	18.7667	0	0.2	0	0.503322	0	0.493288
0.47	849	0.4	7.2	0.9	11.5667	1.9	18.7	0	0.2	0	0.550757	0	0.43589
0.47	852	0.4	7.2	0.9	11.5333	1.9	18.7	0	0.2	0	0.503322	0	0.43589
0.47	855	0.4	7.2	0.9	11.5333	1.9	18.7	0	0.2	0	0.503322	0	0.43589
0.47	858	0.4	7.2	0.9	11.5333	1.9	18.7	0	0.2	0	0.503322	0	0.43589
0.47	861	0.4	7.2	0.9	11.5333	1.9	18.7	0	0.2	0	0.503322	0	0.43589
0.47	864	0.4	7.2	0.9	11.5333	1.9	18.7	0	0.2	0	0.503322	0	0.43589
0.47	867	0.4	7.2	0.9	11.5333	1.9	18.7	0	0.2	0	0.503322	0	0.43589
0.47	870	0.4	7.23333	0.9	11.5333	1.9	18.7	0	0.152753	0	0.503322	0	0.43589
0.47	873	0.4	7.2	0.9	11.5333	1.9	18.7	0	0.2	0	0.503322	0	0.43589
0.47	876	0.4	7.2	0.9	11.5333	1.9	18.7	0	0.2	0	0.503322	0	0.43589
0.47	879	0.4	7.2	0.9	11.5333	1.9	18.7	0	0.2	0	0.503322	0	0.43589
0.47	882	0.4	7.2	0.9	11.5333	1.9	18.6667	0	0.2	0	0.503322	0	0.416333
0.47	885	0.4	7.2	0.9	11.5333	1.9	18.7	0	0.2	0	0.503322	0	0.43589
0.47	888	0.4	7.2	0.9	11.5333	1.9	18.6333	0	0.2	0	0.503322	0	0.472582
0.47	891	0.4	7.23333	0.9	11.5333	1.9	18.6667	0	0.152753	0	0.503322	0	0.493288
0.47	894	0.4	7.23333	0.9	11.5333	1.9	18.6333	0	0.152753	0	0.503322	0	0.472582
0.47	897	0.4	7.23333	0.9	11.5333	1.9	18.6667	0	0.152753	0	0.503322	0	0.416333
0.47	900	0.4	7.23333	0.9	11.5333	1.9	18.6333	0	0.152753	0	0.503322	0	0.472582
0.47	903	0.4	7.2	0.9	11.5333	1.9	18.6333	0	0.2	0	0.503322	0	0.472582
0.47	906	0.4	7.23333	0.9	11.5333	1.9	18.6667	0	0.152753	0	0.503322	0	0.493288
0.47	909	0.4	7.2	0.9	11.5333	1.9	18.6333	0	0.2	0	0.503322	0	0.472582
0.47	912	0.4	7.23333	0.9	11.5333	1.9	18.6333	0	0.152753	0	0.503322	0	0.472582
0.47	915	0.4	7.23333	0.9	11.5333	1.9	18.6333	0	0.152753	0	0.503322	0	0.472582
0.47	918	0.4	7.23333	0.9	11.5333	1.9	18.6	0	0.152753	0	0.503322	0	0.43589
0.47	921	0.4	7.23333	0.9	11.5333	1.9	18.5667	0	0.152753	0	0.503322	0	0.493288
0.47	924	0.4	7.23333	0.9	11.5333	1.9	18.6	0	0.152753	0	0.503322	0	0.43589
0.47	927	0.4	7.23333	0.9	11.5333	1.9	18.5667	0	0.152753	0	0.503322	0	0.493288
0.47	930	0.4	7.2	0.9	11.5333	1.9	18.5667	0	0.2	0	0.503322	0	0.493288
0.47	933	0.4	7.2	0.9	11.5333	1.9	18.6	0	0.2	0	0.503322	0	0.43589
0.47	936	0.4	7.2	0.9	11.5667	1.9	18.5667	0	0.2	0	0.51316	0	0.493288
0.47	939	0.4	7.23333	0.9	11.5333	1.9	18.5667	0	0.152753	0	0.503322	0	0.493288
0.47	942	0.4	7.23333	0.9	11.5333	1.9	18.5667	0	0.152753	0	0.503322	0	0.493288
0.47	945	0.4	7.23333	0.9	11.5333	1.9	18.5667	0	0.152753	0	0.503322	0	0.493288
0.47	948	0.4	7.23333	0.9	11.5333	1.9	18.5667	0	0.152753	0	0.503322	0	0.493288
0.47	951	0.4	7.23333	0.9	11.5333	1.9	18.5667	0	0.152753	0	0.503322	0	0.493288
0.47	954	0.4	7.23333	0.9	11.5333	1.9	18.5333	0	0.152753	0	0.503322	0	0.472582
0.47	957	0.4	7.23333	0.9	11.5333	1.9	18.5333	0	0.152753	0	0.503322	0	0.472582
0.47	960	0.4	7.23333	0.9	11.5333	1.9	18.5333	0	0.152753	0	0.503322	0	0.472582
0.47	963	0.4	7.23333	0.9	11.5333	1.9	18.5667	0	0.152753	0	0.503322	0	0.493288
0.47	966	0.4	7.23333	0.9	11.5333	1.9	18.5333	0	0.152753	0	0.503322	0	0.472582
0.47	969	0.4	7.23333	0.9	11.5333	1.9	18.5333	0	0.152753	0	0.503322	0	0.472582
0.47	972	0.4	7.23333	0.9	11.5333	1.9	18.5333	0	0.152753	0	0.503322	0	0.472582
0.47	975	0.4	7.23333	0.9	11.5333	1.9	18.5333	0	0.152753	0	0.503322	0	0.472582
0.47	978	0.4	7.23333	0.9	11.5333	1.9	18.5	0	0.152753	0	0.503322	0	0.43589
0.47	981	0.4	7.23333	0.9	11.5333	1.9	18.5333	0	0.152753	0	0.503322	0	0.472582
0.47	984	0.4	7.23333	0.9	11.5333	1.9	18.5333	0	0.152753	0	0.503322	0	0.472582
0.47	987	0.4	7.23333	0.9	11.5333	1.9	18.5333	0	0.152753	0	0.503322	0	0.472582
0.47	990	0.4	7.23333	0.9	11.5333	1.9	18.5	0	0.152753	0	0.503322	0	0.43589
0.47	993	0.4	7.23333	0.9	11.5333	1.9	18.5333	0	0.152753	0	0.503322	0	0.472582
0.47	996	0.4	7.23333	0.9	11.5333	1.9	18.5333	0	0.152753	0	0.503322	0	0.472582
0.47	999	0.4	7.23333	0.9	11.5333	1.9	18.5333	0	0.152753	0	0.503322	0	0.472582
0.47	1002	0.4	7.23333	0.9	11.5333	1.9	18.4667	0	0.152753	0	0.503322	0	0.51316
0.47	1005	0.4	7.23333	0.9	11.5333	1.9	18.5	0	0.152753	0	0.503322	0	0.458258
0.47	1008	0.4	7.23333	0.9	11.5333	1.9	18.4667	0	0.152753	0	0.503322	0	0.51316
0.47	1011	0.4	7.23333	0.9	11.5333	1.9	18.4667	0	0.152753	0	0.503322	0	0.51316
0.47	1014	0.4	7.23333	0.9	11.5333	1.9	18.4667	0	0.152753	0	0.503322	0	0.51316
0.47	1017	0.4	7.23333	0.9	11.5333	1.9	18.4667	0	0.152753	0	0.503322	0	0.51316
0.47	1020	0.4	7.23333	0.9	11.5333	1.9	18.4667	0	0.152753	0	0.503322	0	0.51316
0.47	1023	0.4	7.23333	0.9	11.5333	1.9	18.4667	0	0.152753	0	0.503322	0	0.51316
0.47	1026	0.4	7.23333	0.9	11.5333	1.9	18.4667	0	0.152753	0	0.503322	0	0.51316
0.47	1029	0.4	7.23333	0.9	11.5333	1.9	18.5	0	0.152753	0	0.503322	0	0.52915
0.47	1032	0.4	7.23333	0.9	11.5333	1.9	18.4667	0	0.152753	0	0.503322	0	0.51316
0.47	1035	0.4	7.23333	0.9	11.5333	1.9	18.4667	0	0.152753	0	0.503322	0	0.51316
0.47	1038	0.4	7.23333	0.9	11.5333	1.9	18.4667	0	0.152753	0	0.503322	0	0.51316
0.47	1041	0.4	7.23333	0.9	11.5333	1.9	18.4667	0	0.152753	0	0.503322	0	0.51316
0.47	1044	0.4	7.23333	0.9	11.5333	1.9	18.4667	0	0.152753	0	0.503322	0	0.51316
0.47	1047	0.4	7.23333	0.9	11.5333	1.9	18.5	0	0.152753	0	0.503322	0	0.458258
0.47	1050	0.4	7.23333	0.9	11.5333	1.9	18.5	0	0.152753	0	0.503322	0	0.52915
0.47	1053	0.4	7.23333	0.9	11.5333	1.9	18.5	0	0.152753	0	0.503322	0	0.52915
0.47	1056	0.4	7.23333	0.9	11.5333	1.9	18.5	0	0.152753	0	0.503322	0	0.52915
0.47	1059	0.4	7.23333	0.9	11.5333	1.9	18.5	0	0.152753	0	0.503322	0	0.52915
0.47	1062	0.4	7.23333	0.9	11.5333	1.9	18.4333	0	0.152753	0	0.503322	0	0.472582
0.47	1065	0.4	7.23333	0.9	11.5333	1.9	18.5	0	0.152753	0	0.503322	0	0.52915
0.47	1068	0.4	7.23333	0.9	11.5333	1.9	18.4667	0	0.152753	0	0.503322	0	0.493288
0.47	1071	0.4	7.23333	0.9	11.5333	1.9	18.4667	0	0.152753	0	0.503322	0	0.493288
0.47	1074	0.4	7.23333	0.9	11.5333	1.9	18.5	0	0.152753	0	0.503322	0	0.52915
0.47	1077	0.4	7.23333	0.9	11.5333	1.9	18.4333	0	0.152753	0	0.503322	0	0.550757
0.47	1080	0.4	7.23333	0.9	11.5333	1.9	18.4333	0	0.152753	0	0.503322	0	0.472582
0.47	1083	0.4	7.23333	0.9	11.5333	1.9	18.4333	0	0.152753	0	0.503322	0	0.472582
0.47	1086	0.4	7.23333	0.9	11.5333	1.9	18.4	0	0.152753	0	0.503322	0	0.52915
0.47	1089	0.4	7.23333	0.9	11.5333	1.9	18.4667	0	0.152753	0	0.503322	0	0.493288
0.47	1092	0.4	7.23333	0.9	11.5333	1.9	18.4	0	0.152753	0	0.503322	0	0.52915
0.47	1095	0.4	7.23333	0.9	11.5333	1.9	18.4	0	0.152753	0	0.503322	0	0.52915
0.47	1098	0.4	7.23333	0.9	11.5	1.9	18.4	0	0.152753	0	0.556776	0	0.52915
0.47	1101	0.4	7.2	0.9	11.5	1.9	18.4	0	0.2	0	0.556776	0	0.52915
0.47	1104	0.4	7.2	0.9	11.5	1.9	18.3667	0	0.2	0	0.556776	0	0.493288
0.47	1107	0.4	7.2	0.9	11.5	1.9	18.4	0	0.2	0	0.556776	0	0.52915
0.47	1110	0.4	7.23333	0.9	11.5	1.9	18.4	0	0.251661	0	0.556776	0	0.52915
0.47	1113	0.4	7.2	0.9	11.5	1.9	18.4	0	0.2	0	0.556776	0	0.52915
0.47	1116	0.4	7.2	0.9	11.4667	1.9	18.3667	0	0.2	0	0.51316	0	0.493288
0.47	1119	0.4	7.2	0.9	11.5	1.9	18.3667	0	0.2	0	0.556776	0	0.493288
0.47	1122	0.4	7.2	0.9	11.4667	1.9	18.3667	0	0.2	0	0.51316	0	0.493288
0.47	1125	0.4	7.3	0.9	11.5	1.9	18.3667	0	0.264575	0	0.556776	0	0.493288
0.47	1128	0.4	7.23333	0.9	11.5	1.9	18.3667	0	0.208167	0	0.556776	0	0.493288
0.47	1131	0.4	8.33333	0.9	11.4667	1.9	18.3667	0	1.89297	0	0.51316	0	0.493288
0.47	1134	0.4	7.2	0.9	11.5	1.9	18.3667	0	0.2	0	0.556776	0	0.493288
0.47	1137	0.4	7.26667	0.9	11.4667	1.9	18.3667	0	0.251661	0	0.51316	0	0.493288
0.47	1140	0.4	7.26667	0.9	11.4667	1.9	18.4667	0	0.251661	0	0.51316	0	0.61101
0.47	1143	0.4	7.26667	0.9	11.4667	1.9	18.3667	0	0.251661	0	0.51316	0	0.585947
0.47	1146	0.4	7.26667	0.9	11.4667	1.7	18.5667	0	0.251661	0	0.51316	0.34641	0.85049
0.47	1149	0.4	7.26667	0.9	11.4667	1.9	18.1667	0	0.251661	0	0.51316	0	0.568624
0.47	1152	0.4	7.26667	0.9	11.5667	1.9	18.3	0	0.251661	0	0.650641	0	0.556776
0.47	1155	0.4	7.26667	0.9	11.4667	1.9	18.5333	0	0.251661	0	0.51316	0	0.378594
0.47	1158	0.4	7.26667	0.9	11.4667	1.9	18.2667	0	0.251661	0	0.51316	0	0.757188
0.47	1161	0.4	7.26667	0.9	12.1667	1.86667	18.6	0	0.251661	0	1.62583	0.057735	0.72111
0.47	1164	0.4	7.26667	0.866667	11.7	1.9	18.3	0	0.251661	0.057735	0.8544	0	0.556776
0.47	1167	0.4	7.26667	0.9	11.4333	1.9	18.2667	0	0.251661	0	0.503322	0	0.503322
0.47	1170	0.4	7.2	0.9	11.4667	1.9	18.2667	0	0.360555	0	0.493288	0	0.503322
0.47	1173	0.4	7.23333	0.9	11.4667	1.9	18.4333	0	0.305505	0	0.51316	0	0.351188
0.47	1176	0.4	7.23333	0.9	12.4667	1.9	18.4667	0	0.305505	0	1.77858	0	0.351188
0.47	1179	0.4	7.23333	0.9	11.9667	1.9	18.4667	0	0.305505	0	1.0504	0	0.351188
0.47	1182	0.4	7.26667	0.9	11.5	1.9	18.4333	0	0.251661	0	0.6	0	0.305505
0.47	1185	0.4	7.26667	0.9	11.4667	1.9	18.4667	0	0.251661	0	0.550757	0	0.351188
0.47	1188	0.4	7.26667	0.9	11.4667	1.9	18.5667	0	0.251661	0	0.550757	0	0.503322
0.47	1191	0.4	7.26667	0.9	11.5333	1.9	18.5667	0	0.251661	0	0.602771	0	0.503322
0.47	1194	0.4	7.3	0.9	11.5333	1.9	18.5333	0	0.264575	0	0.568624	0	0.450925
0.47	1197	0.4	7.26667	0.9	11.5667	1.9	18.5	0	0.23094	0	0.61101	0	0.5
0.47	1200	0.4	7.26667	0.9	11.5667	1.9	18.5333	0	0.23094	0	0.61101	0	0.450925
0.46	1203	0.4	7.26667	0.9	11.6	1.9	18.5	0	0.23094	0	0.556776	0	0.5
0.46	1206	0.4	7.73333	0.9	11.5667	1.9	18.5	0	0.945163	0	0.51316	0	0.5
0.46	1209	0.4	7.93333	0.9	11.6	1.9	18.5	0	1.28582	0	0.458258	0	0.5
0.46	1212	0.4	7.26667	0.9	11.5667	1.9	18.5	0	0.23094	0	0.51316	0	0.5
0.46	1215	0.4	7.26667	0.9	11.6	1.9	18.5	0	0.23094	0	0.556776	0	0.5
0.46	1218	0.4	7.26667	0.9	11.6333	1.9	18.5	0	0.23094	0	0.503322	0	0.5
0.46	1221	0.4	7.3	0.9	11.6	1.9	18.4667	0	0.264575	0	0.556776	0	0.503322
0.46	1224	0.4	7.3	0.9	11.6333	1.9	18.5	0	0.264575	0	0.503322	0	0.5
0.46	1227	0.4	7.33333	0.9	11.6333	1.9	18.4667	0	0.208167	0	0.503322	0	0.503322
0.46	1230	0.4	7.3	0.9	11.5667	1.9	18.4667	0	0.264575	0	0.51316	0	0.503322
0.46	1233	0.4	7.33333	0.9	11.6333	1.9	18.4667	0	0.208167	0	0.503322	0	0.503322
0.46	1236	0.4	7.33333	0.9	11.6333	1.9	18.4667	0	0.208167	0	0.503322	0	0.503322
0.46	1239	0.4	7.3	0.9	11.5667	1.9	18.4667	0	0.264575	0	0.51316	0	0.503322
0.46	1242	0.4	7.33333	0.9	11.6667	1.9	18.4667	0	0.208167	0	0.51316	0	0.503322
0.46	1245	0.4	7.33333	0.9	11.6333	1.9	18.4667	0	0.208167	0	0.503322	0	0.503322
0.46	1248	0.4	7.33333	0.9	11.6	1.9	18.4667	0	0.208167	0	0.458258	0	0.503322
0.46	1251	0.4	7.33333	0.9	11.6	1.9	18.4667	0	0.208167	0	0.458258	0	0.503322
0.46	1254	0.4	7.33333	0.9	11.6	1.9	18.4667	0	0.208167	0	0.458258	0	0.503322
0.46	1257	0.4	7.33333	0.9	11.6	1.9	18.4667	0	0.208167	0	0.458258	0	0.503322
0.46	1260	0.4	7.33333	0.9	11.6	1.9	18.4667	0	0.208167	0	0.458258	0	0.503322
0.46	1263	0.4	7.33333	0.9	11.6	1.9	18.4667	0	0.208167	0	0.458258	0	0.503322
0.46	1266	0.4	7.36667	0.9	11.6333	1.9	18.4333	0	0.251661	0	0.503322	0	0.550757
0.46	1269	0.4	7.33333	0.9	11.6333	1.9	18.4667	0	0.208167	0	0.503322	0	0.503322
0.46	1272	0.4	7.36667	0.9	11.6	1.9	18.4	0	0.251661	0	0.5	0	0.556776
0.46	1275	0.4	7.36667	0.9	11.5667	1.9	18.4333	0	0.251661	0	0.51316	0	0.550757
0.46	1278	0.4	7.33333	0.9	11.6	1.9	18.4667	0	0.208167	0	0.5	0	0.503322
0.46	1281	0.4	7.33333	0.9	11.6333	1.9	18.4333	0	0.208167	0	0.503322	0	0.550757
0.46	1284	0.4	7.36667	0.9	11.6333	1.9	18.4333	0	0.251661	0	0.503322	0	0.550757
0.46	1287	0.4	7.36667	0.9	11.6333	1.9	18.4333	0	0.251661	0	0.503322	0	0.550757
0.46	1290	0.4	7.36667	0.9	11.5667	1.9	18.4333	0	0.251661	0	0.450925	0	0.550757
0.46	1293	0.4	7.36667	0.9	11.6	1.9	18.4333	0	0.251661	0	0.5	0	0.550757
0.46	1296	0.4	7.36667	0.9	11.5667	1.9	18.4	0	0.251661	0	0.550757	0	0.556776
0.46	1299	0.4	7.36667	0.9	11.6333	1.9	18.4	0	0.251661	0	0.503322	0	0.556776
0.46	1302	0.4	7.36667	0.9	11.6	1.9	18.4	0	0.251661	0	0.5	0	0.556776
0.46	1305	0.4	7.36667	0.9	11.5667	1.9	18.3667	0	0.251661	0	0.450925	0	0.602771
0.46	1308	0.4	7.36667	0.9	11.5667	1.9	18.4	0	0.251661	0	0.550757	0	0.556776
0.46	1311	0.4	7.36667	0.9	11.5333	1.9	18.4	0	0.251661	0	0.503322	0	0.556776
0.46	1314	0.4	7.36667	0.9	11.5667	1.9	18.4	0	0.251661	0	0.450925	0	0.556776
0.46	1317	0.4	7.36667	0.9	11.5667	1.9	18.3667	0	0.251661	0	0.450925	0	0.602771
0.46	1320	0.4	7.36667	0.9	11.6	1.9	18.3667	0	0.251661	0	0.5	0	0.602771
0.46	1323	0.4	7.36667	0.9	11.5667	1.9	18.3667	0	0.251661	0	0.450925	0	0.602771
0.46	1326	0.4	7.36667	0.9	11.5667	1.9	18.3667	0	0.251661	0	0.450925	0	0.602771
0.46	1329	0.4	7.36667	0.9	11.5667	1.9	18.3667	0	0.251661	0	0.450925	0	0.602771
0.46	1332	0.4	7.36667	0.9	11.6	1.9	18.3667	0	0.251661	0	0.5	0	0.602771
0.46	1335	0.4	7.36667	0.9	11.5667	1.9	18.3667	0	0.251661	0	0.450925	0	0.602771
0.46	1338	0.4	7.36667	0.9	11.5667	1.9	18.3667	0	0.251661	0	0.550757	0	0.602771
0.46	1341	0.4	7.36667	0.9	11.5667	1.9	18.3333	0	0.251661	0	0.450925	0	0.550757
0.46	1344	0.4	7.36667	0.9	11.5667	1.9	18.3667	0	0.251661	0	0.550757	0	0.602771
0.46	1347	0.4	7.36667	0.9	11.5667	1.9	18.3333	0	0.251661	0	0.450925	0	0.550757
0.46	1350	0.4	7.36667	0.9	11.6	1.9	18.3667	0	0.251661	0	0.5	0	0.602771
0.46	1353	0.4	7.36667	0.9	11.6333	1.9	18.3667	0	0.251661	0	0.503322	0	0.550757
0.46	1356	0.4	7.36667	0.9	11.5667	1.9	18.3667	0	0.251661	0	0.450925	0	0.550757
0.46	1359	0.4	7.36667	0.9	11.5667	1.9	18.3333	0	0.251661	0	0.450925	0	0.550757
0.46	1362	0.4	7.36667	0.9	11.6	1.9	18.3333	0	0.251661	0	0.5	0	0.550757
0.46	1365	0.4	7.36667	0.9	11.6	1.9	18.3333	0	0.251661	0	0.556776	0	0.550757
0.46	1368	0.4	7.36667	0.9	11.6	1.9	18.3333	0	0.251661	0	0.5	0	0.550757
0.46	1371	0.4	7.36667	0.9	11.6	1.9	18.3667	0	0.251661	0	0.458258	0	0.550757
0.46	1374	0.4	7.36667	0.9	11.6	1.9	18.3333	0	0.251661	0	0.5	0	0.550757
0.46	1377	0.4	7.36667	0.9	11.5333	1.9	18.3	0	0.251661	0	0.503322	0	0.6
0.46	1380	0.4	7.36667	0.9	11.5667	1.9	18.3333	0	0.251661	0	0.450925	0	0.602771
0.46	1383	0.4	7.36667	0.9	11.5667	1.9	18.3333	0	0.251661	0	0.51316	0	0.602771
0.46	1386	0.4	7.36667	0.9	11.5333	1.9	18.3333	0	0.251661	0	0.503322	0	0.550757
0.46	1389	0.4	7.36667	0.9	11.5667	1.9	18.3	0	0.251661	0	0.51316	0	0.6
0.46	1392	0.4	7.36667	0.9	11.5333	1.9	18.3	0	0.251661	0	0.503322	0	0.6
0.46	1395	0.4	7.36667	0.9	11.5667	1.9	18.3667	0	0.251661	0	0.51316	0	0.550757
0.46	1398	0.4	7.4	0.9	11.5667	1.9	18.3333	0	0.264575	0	0.51316	0	0.550757
0.46	1401	0.4	7.36667	0.9	11.5667	1.9	18.3333	0	0.251661	0	0.51316	0	0.550757
0.46	1404	0.4	7.36667	0.9	11.5333	1.9	18.3333	0	0.251661	0	0.503322	0	0.550757
0.46	1407	0.4	7.36667	0.9	11.5667	1.9	18.3333	0	0.251661	0	0.51316	0	0.550757
0.46	1410	0.4	7.36667	0.9	11.5333	1.9	18.3667	0	0.251661	0	0.503322	0	0.550757
0.46	1413	0.4	7.36667	0.9	11.5333	1.9	18.3333	0	0.251661	0	0.503322	0	0.550757
0.46	1416	0.4	7.36667	0.9	11.5667	1.9	18.3333	0	0.251661	0	0.51316	0	0.550757
0.46	1419	0.4	7.4	0.9	11.5667	1.9	18.3333	0	0.264575	0	0.51316	0	0.503322
0.46	1422	0.4	7.4	0.9	11.5667	1.9	18.3	0	0.264575	0	0.51316	0	0.5
0.46	1425	0.4	7.36667	0.9	11.5667	1.9	18.3	0	0.251661	0	0.51316	0	0.5
0.46	1428	0.4	7.36667	0.9	11.5667	1.9	18.3	0	0.251661	0	0.51316	0	0.5
0.46	1431	0.4	7.4	0.9	11.5667	1.9	18.3	0	0.264575	0	0.51316	0	0.5
0.46	1434	0.4	7.4	0.9	11.5667	1.9	18.3	0	0.264575	0	0.51316	0	0.5
0.46	1437	0.4	7.4	0.9	11.5667	1.9	18.3	0	0.264575	0	0.51316	0	0.5
0.46	1440	0.4	7.4	0.9	11.5667	1.9	18.3	0	0.264575	0	0.51316	0	0.5
0.46	1443	0.4	7.36667	0.9	11.5667	1.9	18.3	0	0.251661	0	0.51316	0	0.5
0.46	1446	0.4	7.4	0.9	11.5667	1.9	18.3	0	0.264575	0	0.51316	0	0.5
0.46	1449	0.4	7.4	0.9	11.5667	1.9	18.3	0	0.264575	0	0.51316	0	0.5
0.46	1452	0.4	7.36667	0.9	11.5667	1.9	18.2667	0	0.251661	0	0.51316	0	0.550757
0.46	1455	0.4	7.4	0.9	11.5667	1.9	18.3	0	0.264575	0	0.51316	0	0.5
0.46	1458	0.4	7.36667	0.9	11.5667	1.9	18.2667	0	0.251661	0	0.51316	0	0.550757
0.46	1461	0.4	7.4	0.9	11.5667	1.9	18.2333	0	0.264575	0	0.51316	0	0.550757
0.46	1464	0.4	7.36667	0.9	11.5667	1.9	18.2667	0	0.251661	0	0.51316	0	0.550757
0.46	1467	0.4	7.4	0.9	11.5667	1.9	18.2667	0	0.264575	0	0.51316	0	0.550757
0.46	1470	0.4	7.4	0.9	11.5667	1.9	18.2667	0	0.264575	0	0.51316	0	0.550757
0.46	1473	0.4	7.4	0.9	11.5667	1.9	18.2333	0	0.264575	0	0.51316	0	0.550757
0.46	1476	0.4	7.4	0.9	11.5667	1.9	18.3	0	0.264575	0	0.51316	0	0.6
0.46	1479	0.4	7.36667	0.9	11.5667	1.9	18.3	0	0.251661	0	0.51316	0	0.6
0.46	1482	0.4	7.36667	0.9	11.5667	1.9	18.3	0	0.251661	0	0.51316	0	0.6
0.46	1485	0.4	7.4	0.9	11.5667	1.9	18.2667	0	0.264575	0	0.51316	0	0.602771
0.46	1488	0.4	7.36667	0.9	11.5667	1.9	18.2667	0	0.251661	0	0.51316	0	0.602771
0.46	1491	0.4	7.4	0.9	11.5667	1.9	18.2333	0	0.264575	0	0.51316	0	0.550757
0.46	1494	0.4	7.4	0.9	11.5667	1.9	18.2667	0	0.264575	0	0.51316	0	0.602771
0.46	1497	0.4	7.4	0.9	11.5667	1.9	18.2667	0	0.264575	0	0.51316	0	0.650641
0.46	1500	0.4	7.4	0.9	11.5667	1.9	18.2667	0	0.264575	0	0.51316	0	0.650641
0.46	1503	0.4	7.4	0.9	11.5667	1.9	18.2333	0	0.264575	0	0.51316	0	0.650641
0.46	1506	0.4	7.4	0.9	11.5667	1.9	18.2	0	0.264575	0	0.51316	0	0.6
0.46	1509	0.4	7.4	0.9	11.5667	1.9	18.2333	0	0.264575	0	0.51316	0	0.650641
0.46	1512	0.4	7.4	0.9	11.5667	1.9	18.2333	0	0.264575	0	0.51316	0	0.650641
0.46	1515	0.4	7.4	0.9	11.5667	1.9	18.2	0	0.264575	0	0.51316	0	0.6
0.46	1518	0.4	7.4	0.9	11.5667	1.9	18.2333	0	0.264575	0	0.51316	0	0.650641
0.46	1521	0.4	7.4	0.9	11.5667	1.9	18.2333	0	0.264575	0	0.51316	0	0.650641
0.46	1524	0.4	7.4	0.9	11.5667	1.9	18.2	0	0.264575	0	0.51316	0	0.6
0.46	1527	0.4	7.4	0.9	11.5667	1.9	18.2333	0	0.264575	0	0.51316	0	0.650641
0.46	1530	0.4	7.4	0.9	11.5667	1.9	18.2333	0	0.264575	0	0.51316	0	0.650641
0.46	1533	0.4	7.4	0.9	11.5667	1.9	18.2	0	0.264575	0	0.51316	0	0.6
0.46	1536	0.4	7.4	0.9	11.5667	1.9	18.2	0	0.264575	0	0.51316	0	0.6
0.46	1539	0.4	7.4	0.9	11.5667	1.9	18.2	0	0.264575	0	0.51316	0	0.6
0.46	1542	0.4	7.4	0.9	11.5333	1.9	18.2	0	0.264575	0	0.503322	0	0.6
0.46	1545	0.4	7.4	0.9	11.5667	1.9	18.2	0	0.264575	0	0.51316	0	0.6
0.46	1548	0.4	7.4	0.9	11.5667	1.9	18.2	0	0.264575	0	0.51316	0	0.6
0.46	1551	0.4	7.4	0.9	11.5667	1.9	18.2	0	0.264575	0	0.51316	0	0.6
0.46	1554	0.4	7.4	0.9	11.5	1.9	18.2333	0	0.264575	0	0.6245	0	0.650641
0.46	1557	0.4	7.4	0.9	11.4333	1.9	18.2	0	0.264575	0	0.665833	0	0.6
0.46	1560	0.4	7.4	0.9	11.5333	1.9	18.2	0	0.264575	0	0.568624	0	0.6
0.46	1563	0.4	7.4	0.9	11.4333	1.9	18.2	0	0.264575	0	0.665833	0	0.6
0.46	1566	0.4	7.4	0.9	11.5667	1.9	18.2	0	0.264575	0	0.51316	0	0.6
0.46	1569	0.4	7.4	0.9	11.5333	1.9	18.2	0	0.264575	0	0.503322	0	0.6
0.46	1572	0.4	7.4	0.9	11.5667	1.9	18.2	0	0.264575	0	0.450925	0	0.6
0.46	1575	0.4	7.4	0.9	11.5333	1.9	18.1667	0	0.264575	0	0.503322	0	0.650641
0.46	1578	0.4	7.4	0.9	11.5667	1.9	18.2	0	0.264575	0	0.51316	0	0.6
0.46	1581	0.4	7.4	0.9	11.5333	1.9	18.1667	0	0.264575	0	0.503322	0	0.650641
0.46	1584	0.4	7.4	0.9	11.5333	1.9	18.1667	0	0.264575	0	0.503322	0	0.650641
0.46	1587	0.4	7.4	0.9	11.5333	1.9	18.1333	0	0.264575	0	0.503322	0	0.602771
0.46	1590	0.4	7.4	0.9	11.5	1.9	18.1667	0	0.264575	0	0.556776	0	0.650641
0.46	1593	0.4	7.4	0.9	11.5333	1.9	18.1333	0	0.264575	0	0.503322	0	0.602771
0.46	1596	0.4	7.4	0.9	11.5333	1.9	18.1333	0	0.264575	0	0.503322	0	0.602771
0.46	1599	0.4	7.4	0.9	11.5333	1.9	18.1333	0	0.264575	0	0.503322	0	0.602771
0.46	1602	0.4	7.4	0.9	11.5333	1.9	18.1333	0	0.264575	0	0.503322	0	0.602771
0.46	1605	0.4	7.4	0.9	11.5333	1.9	18.1333	0	0.264575	0	0.503322	0	0.602771
0.46	1608	0.4	7.36667	0.9	11.5333	1.9	18.1333	0	0.251661	0	0.503322	0	0.602771
0.46	1611	0.4	7.36667	0.9	11.5333	1.9	18.1333	0	0.251661	0	0.503322	0	0.602771
0.46	1614	0.4	7.36667	0.9	11.5333	1.9	18.1	0	0.251661	0	0.503322	0	0.6
0.46	1617	0.4	7.36667	0.9	11.5333	1.9	18.1333	0	0.251661	0	0.503322	0	0.602771
0.46	1620	0.4	7.36667	0.9	11.5333	1.9	18.1333	0	0.251661	0	0.503322	0	0.602771
0.46	1623	0.4	7.36667	0.9	11.5333	1.9	18.1	0	0.251661	0	0.503322	0	0.6
0.46	1626	0.4	7.36667	0.9	11.5333	1.9	18.1333	0	0.251661	0	0.503322	0	0.602771
0.46	1629	0.4	7.36667	0.9	11.5333	1.9	18.1333	0	0.251661	0	0.503322	0	0.602771
0.46	1632	0.4	7.36667	0.9	11.5333	1.9	18.1333	0	0.251661	0	0.503322	0	0.602771
0.46	1635	0.4	7.36667	0.9	11.5333	1.9	18.1	0	0.251661	0	0.503322	0	0.556776
0.46	1638	0.4	7.36667	0.9	11.5333	1.9	18.1333	0	0.251661	0	0.503322	0	0.602771
0.46	1641	0.4	7.36667	0.9	11.5333	1.9	18.1333	0	0.251661	0	0.503322	0	0.602771
0.46	1644	0.4	7.36667	0.9	11.5333	1.9	18.0667	0	0.251661	0	0.503322	0	0.61101
0.46	1647	0.4	7.36667	0.9	11.5333	1.9	18.1	0	0.251661	0	0.503322	0	0.655744
0.46	1650	0.4	7.33333	0.9	11.5333	1.9	18.1	0	0.305505	0	0.503322	0	0.655744
0.46	1653	0.4	7.36667	0.9	11.5333	1.9	18.1	0	0.251661	0	0.503322	0	0.655744
0.46	1656	0.4	7.33333	0.9	11.5333	1.9	18.0667	0	0.305505	0	0.503322	0	0.61101
0.46	1659	0.4	7.33333	0.9	11.5333	1.9	18.0667	0	0.305505	0	0.503322	0	0.61101
0.46	1662	0.4	7.33333	0.9	11.5667	1.9	18.1	0	0.305505	0	0.51316	0	0.655744
0.46	1665	0.4	7.33333	0.9	11.5333	1.9	18.1	0	0.305505	0	0.503322	0	0.655744
0.46	1668	0.4	7.33333	0.9	11.5333	1.9	18.0667	0	0.305505	0	0.503322	0	0.61101
0.46	1671	0.4	7.33333	0.9	11.5333	1.9	18.1	0	0.305505	0	0.503322	0	0.655744
0.46	1674	0.4	7.33333	0.9	11.5667	1.9	18.1	0	0.305505	0	0.51316	0	0.655744
0.46	1677	0.4	7.33333	0.9	11.5667	1.9	18.0667	0	0.305505	0	0.51316	0	0.61101
0.46	1680	0.4	7.33333	0.9	11.5333	1.9	18.1	0	0.305505	0	0.503322	0	0.655744
0.46	1683	0.4	7.33333	0.9	11.5333	1.9	18.0667	0	0.305505	0	0.503322	0	0.61101
0.46	1686	0.4	7.33333	0.9	11.5667	1.9	18.0667	0	0.305505	0	0.51316	0	0.61101
0.46	1689	0.4	7.33333	0.9	11.5667	1.9	17.9333	0	0.305505	0	0.51316	0	0.832666
0.46	1692	0.4	7.33333	0.9	11.5667	1.9	17.8	0	0.305505	0	0.51316	0	1.0583
0.46	1695	0.4	7.33333	0.9	11.5	1.9	17.9333	0	0.305505	0	0.458258	0	0.832666
0.46	1698	0.4	7.33333	0.9	11.5	1.9	17.9667	0	0.305505	0	0.52915	0	0.776745
0.46	1701	0.4	7.33333	0.9	11.5333	1.9	17.9667	0	0.305505	0	0.568624	0	0.776745
0.46	1704	0.4	7.33333	0.9	11.5	1.9	17.9667	0	0.305505	0	0.52915	0	0.776745
0.46	1707	0.4	7.33333	0.9	11.5333	1.9	17.9667	0	0.305505	0	0.568624	0	0.776745
0.46	1710	0.4	7.33333	0.9	11.5	1.9	17.9667	0	0.305505	0	0.52915	0	0.776745
0.46	1713	0.4	7.33333	0.9	11.5	1.9	17.9667	0	0.305505	0	0.52915	0	0.776745
0.46	1716	0.4	7.33333	0.9	11.5	1.9	17.9667	0	0.305505	0	0.52915	0	0.776745
0.46	1719	0.4	7.33333	0.9	11.5333	1.9	17.9667	0	0.305505	0	0.568624	0	0.776745
0.46	1722	0.4	7.33333	0.9	11.4667	1.9	17.9333	0	0.305505	0	0.51316	0	0.832666
0.46	1725	0.4	7.33333	0.9	11.5	1.9	17.9333	0	0.305505	0	0.52915	0	0.832666
0.46	1728	0.4	7.33333	0.9	11.5	1.9	17.9333	0	0.305505	0	0.52915	0	0.832666
0.46	1731	0.4	7.33333	0.9	11.5	1.9	17.9333	0	0.305505	0	0.52915	0	0.832666
0.46	1734	0.4	7.33333	0.9	11.5	1.9	17.9333	0	0.305505	0	0.52915	0	0.832666
0.46	1737	0.4	7.33333	0.9	11.5	1.9	17.9	0	0.305505	0	0.52915	0	0.818535
0.46	1740	0.4	7.33333	0.9	11.5	1.9	17.9	0	0.305505	0	0.52915	0	0.818535
0.46	1743	0.4	7.33333	0.9	11.5	1.9	17.9	0	0.305505	0	0.6245	0	0.818535
0.46	1746	0.4	7.3	0.9	11.5	1.9	17.9	0	0.264575	0	0.52915	0	0.818535
0.46	1749	0.4	7.33333	0.9	11.5	1.9	17.9	0	0.305505	0	0.52915	0	0.818535
0.46	1752	0.4	7.13333	0.9	11.5333	1.9	17.6333	0	0.11547	0	0.568624	0	0.70946
0.46	1755	0.4	7.3	0.9	11.5333	1.9	17.9333	0	0.264575	0	0.568624	0	0.763763
0.46	1758	0.433333	9.13333	0.9	11.5333	1.9	19	0.057735	1.95533	0	0.568624	0	2.02978
0.46	1761	0.4	7.66667	0.9	11.5	1.66667	18.4333	0	0.981495	0	0.52915	0.404145	1.23423
0.46	1764	0.4	7.26667	0.9	11.5333	1.9	18.0667	0	0.208167	0	0.568624	0	0.61101
0.46	1767	0.4	7.26667	0.9	11.5333	1.9	18.1	0	0.208167	0	0.568624	0	0.556776
0.46	1770	0.4	7.26667	0.9	11.5667	1.9	18.2	0	0.208167	0	0.51316	0	0.754983
0.46	1773	0.4	7.26667	0.9	11.6	1.9	18.3	0	0.208167	0	0.458258	0	0.793725
0.46	1776	0.4	7.26667	0.9	11.5667	1.9	18.3	0	0.208167	0	0.51316	0	0.793725
0.46	1779	0.4	7.23333	0.9	11.6333	1.9	18.3	0	0.251661	0	0.550757	0	0.793725
0.46	1782	0.4	7.26667	0.9	11.6	1.9	18.3	0	0.208167	0	0.458258	0	0.793725
0.46	1785	0.4	7.26667	0.9	12.1667	1.9	18.3	0	0.208167	0	1.15902	0	0.793725
0.46	1788	0.4	7.26667	0.9	12.0333	1.9	18.3	0	0.208167	0	0.950438	0	0.793725
0.46	1791	0.4	7.26667	0.9	11.6667	1.9	18.3	0	0.305505	0	0.493288	0	0.793725
0.46	1794	0.4	7.3	0.9	11.6333	1.9	18.3	0	0.264575	0	0.550757	0	0.793725
0.46	1797	0.4	7.33333	0.9	11.7333	1.9	18.3	0	0.251661	0	0.550757	0	0.793725
0.46	1800	0.4	7.33333	0.9	11.6667	1.9	18.3	0	0.251661	0	0.585947	0	0.793725
0.45	1803	0.4	7.36667	0.9	11.7	1.9	18.3	0	0.305505	0	0.52915	0	0.793725
0.45	1806	0.4	7.33333	0.9	11.7333	1.9	18.2667	0	0.251661	0	0.550757	0	0.776745
0.45	1809	0.4	7.36667	0.9	11.7	1.9	18.3	0	0.305505	0	0.52915	0	0.793725
0.45	1812	0.4	7.33333	0.9	11.7333	1.9	18.3	0	0.351188	0	0.550757	0	0.793725
0.45	1815	0.4	7.36667	0.9	11.7333	1.9	18.3	0	0.305505	0	0.550757	0	0.793725
0.45	1818	0.4	7.4	0.9	11.7333	1.9	18.2667	0	0.3	0	0.550757	0	0.85049
0.45	1821	0.4	7.36667	0.9	11.7	1.9	18.3	0	0.305505	0	0.52915	0	0.793725
0.45	1824	0.4	7.4	0.9	11.4667	1.9	18.3	0	0.264575	0	0.550757	0	0.793725
0.45	1827	0.4	7.4	0.9	11.5667	1.9	18.3	0	0.264575	0	0.503322	0	0.793725
0.45	1830	0.4	7.43333	0.9	11.7	1.9	18.2667	0	0.251661	0	0.52915	0	0.757188
0.45	1833	0.4	7.4	0.9	12.1333	1.9	18.3	0	0.264575	0	1.0504	0	0.793725
0.45	1836	0.4	7.43333	0.9	11.7333	1.9	18.2667	0	0.251661	0	0.550757	0	0.776745
0.45	1839	0.4	7.4	0.9	11.6667	1.9	18.2667	0	0.264575	0	0.51316	0	0.776745
0.45	1842	0.4	7.43333	0.9	11.6667	1.9	18.2333	0	0.251661	0	0.493288	0	0.832666
0.45	1845	0.4	7.4	0.9	11.7	1.9	18.2	0	0.264575	0	0.519615	0	0.793725
0.45	1848	0.4	7.4	0.9	11.7	1.9	18.2	0	0.264575	0	0.519615	0	0.793725
0.45	1851	0.4	7.43333	0.9	11.7	1.9	18.2333	0	0.251661	0	0.519615	0	0.832666
0.45	1854	0.4	7.43333	0.9	11.7	1.9	18.2	0	0.251661	0	0.519615	0	0.793725
0.45	1857	0.4	7.43333	0.9	11.7	1.9	18.2	0	0.251661	0	0.519615	0	0.793725
0.45	1860	0.4	7.43333	0.9	11.7	1.9	18.2333	0	0.251661	0	0.519615	0	0.832666
0.45	1863	0.4	7.4	0.9	11.7	1.9	18.2	0	0.264575	0	0.519615	0	0.793725
0.45	1866	0.4	7.4	0.9	11.7	1.9	18.2	0	0.264575	0	0.519615	0	0.793725
0.45	1869	0.4	7.4	0.9	11.7	1.9	18.2	0	0.264575	0	0.519615	0	0.793725
0.45	1872	0.4	7.43333	0.9	11.7	1.9	18.2667	0	0.251661	0	0.519615	0	0.776745
0.45	1875	0.4	7.43333	0.9	11.7	1.9	18.2	0	0.251661	0	0.519615	0	0.793725
0.45	1878	0.4	7.43333	0.9	11.7	1.9	18.2	0	0.251661	0	0.519615	0	0.793725
0.45	1881	0.4	7.43333	0.9	11.7	1.9	18.2	0	0.251661	0	0.519615	0	0.793725
0.45	1884	0.4	7.43333	0.9	11.7	1.9	18.2	0	0.251661	0	0.519615	0	0.793725
0.45	1887	0.4	7.43333	0.9	11.7	1.9	18.2	0	0.251661	0	0.519615	0	0.793725
0.45	1890	0.4	7.43333	0.9	11.7	1.9	18.2	0	0.251661	0	0.519615	0	0.793725
0.45	1893	0.4	7.46667	0.9	11.7	1.9	18.2	0	0.305505	0	0.519615	0	0.793725
0.45	1896	0.4	7.43333	0.9	11.7	1.9	18.2	0	0.251661	0	0.519615	0	0.793725
0.45	1899	0.4	7.43333	0.9	11.7	1.9	18.2	0	0.251661	0	0.519615	0	0.793725
0.45	1902	0.4	7.46667	0.9	11.7	1.9	18.2	0	0.305505	0	0.519615	0	0.793725
0.45	1905	0.4	7.43333	0.9	11.7	1.9	18.2	0	0.251661	0	0.519615	0	0.793725
0.45	1908	0.4	7.46667	0.9	11.7	1.9	18.2	0	0.305505	0	0.519615	0	0.793725
0.45	1911	0.4	7.46667	0.9	11.7	1.9	18.1667	0	0.305505	0	0.519615	0	0.85049
0.45	1914	0.4	7.46667	0.9	11.7	1.9	18.2	0	0.305505	0	0.519615	0	0.793725
0.45	1917	0.4	7.43333	0.9	11.7	1.9	18.2	0	0.321455	0	0.519615	0	0.793725
0.45	1920	0.4	7.46667	0.9	11.7	1.9	18.1667	0	0.305505	0	0.519615	0	0.85049
0.45	1923	0.4	7.46667	0.9	11.7	1.9	18.1667	0	0.305505	0	0.519615	0	0.85049
0.45	1926	0.4	7.46667	0.9	11.7	1.9	18.1667	0	0.305505	0	0.519615	0	0.85049
0.45	1929	0.4	7.43333	0.9	11.7	1.9	18.1667	0	0.251661	0	0.519615	0	0.85049
0.45	1932	0.4	7.46667	0.9	11.7	1.9	18.1667	0	0.305505	0	0.519615	0	0.85049
0.45	1935	0.4	7.46667	0.9	11.7	1.9	18.1667	0	0.305505	0	0.519615	0	0.85049
0.45	1938	0.4	7.46667	0.9	11.7	1.9	18.1667	0	0.305505	0	0.519615	0	0.85049
0.45	1941	0.4	7.46667	0.9	11.7	1.9	18.1667	0	0.305505	0	0.519615	0	0.85049
0.45	1944	0.4	7.46667	0.9	11.7	1.9	18.1667	0	0.305505	0	0.519615	0	0.85049
0.45	1947	0.4	7.46667	0.9	11.7	1.9	18.1667	0	0.305505	0	0.519615	0	0.85049
0.45	1950	0.4	7.46667	0.9	11.7	1.9	18.1667	0	0.305505	0	0.519615	0	0.85049
0.45	1953	0.4	7.46667	0.9	11.7	1.9	18.1667	0	0.305505	0	0.519615	0	0.85049
0.45	1956	0.4	7.46667	0.9	11.7	1.9	18.1667	0	0.305505	0	0.519615	0	0.85049
0.45	1959	0.4	7.46667	0.9	11.7	1.9	18.1667	0	0.305505	0	0.519615	0	0.85049
0.45	1962	0.4	7.46667	0.9	11.7	1.9	18.1667	0	0.305505	0	0.519615	0	0.85049
0.45	1965	0.4	7.46667	0.9	11.7333	1.9	18.1667	0	0.305505	0	0.550757	0	0.85049
0.45	1968	0.4	7.46667	0.9	11.7	1.9	18.1667	0	0.305505	0	0.519615	0	0.85049
0.45	1971	0.4	7.46667	0.9	11.7	1.9	18.1667	0	0.305505	0	0.519615	0	0.85049
0.45	1974	0.4	7.46667	0.9	11.7333	1.9	18.1667	0	0.305505	0	0.550757	0	0.85049
0.45	1977	0.4	7.46667	0.9	11.7	1.9	18.1667	0	0.305505	0	0.519615	0	0.85049
0.45	1980	0.4	7.46667	0.9	11.7333	1.9	18.1667	0	0.305505	0	0.550757	0	0.85049
0.45	1983	0.4	7.46667	0.9	11.7	1.9	18.1667	0	0.305505	0	0.519615	0	0.85049
0.45	1986	0.4	7.46667	0.9	11.7	1.9	18.1667	0	0.305505	0	0.519615	0	0.85049
0.45	1989	0.4	7.46667	0.9	11.7	1.9	18.1667	0	0.305505	0	0.519615	0	0.85049
0.45	1992	0.4	7.46667	0.9	11.6667	1.9	18.1667	0	0.305505	0	0.57735	0	0.85049
0.45	1995	0.4	7.46667	0.9	11.6667	1.9	18.1667	0	0.305505	0	0.57735	0	0.85049
0.45	1998	0.4	7.46667	0.9	11.7	1.9	18.1333	0	0.305505	0	0.608276	0	0.907377
0.45	2001	0.4	7.5	0.9	11.6667	1.9	18.1333	0	0.264575	0	0.57735	0	0.907377
0.45	2004	0.4	7.46667	0.9	11.7	1.9	18.1333	0	0.305505	0	0.519615	0	0.814453
0.45	2007	0.4	7.5	0.9	11.6667	1.9	18.1333	0	0.264575	0	0.57735	0	0.814453
0.45	2010	0.4	7.46667	0.9	11.7	1.9	18.1667	0	0.305505	0	0.608276	0	0.85049
0.45	2013	0.4	7.46667	0.9	11.7	1.9	18.1	0	0.305505	0	0.608276	0	0.87178
0.45	2016	0.4	7.46667	0.9	11.7	1.9	18.1	0	0.305505	0	0.608276	0	0.87178
0.45	2019	0.4	7.46667	0.9	11.7	1.9	18.1	0	0.305505	0	0.608276	0	0.87178
0.45	2022	0.4	7.46667	0.9	11.6667	1.9	18.1333	0	0.305505	0	0.57735	0	0.907377
0.45	2025	0.4	7.46667	0.9	11.7	1.9	18.1	0	0.305505	0	0.608276	0	0.87178
0.45	2028	0.4	7.46667	0.9	11.7	1.9	18.1	0	0.305505	0	0.608276	0	0.87178
0.45	2031	0.4	7.46667	0.9	11.7	1.9	18.1	0	0.305505	0	0.608276	0	0.87178
0.45	2034	0.4	7.46667	0.9	11.7	1.9	18.1333	0	0.305505	0	0.608276	0	0.907377
0.45	2037	0.4	7.46667	0.9	11.7	1.9	18.1	0	0.305505	0	0.608276	0	0.87178
0.45	2040	0.4	7.5	0.9	11.7	1.9	18.1333	0	0.264575	0	0.608276	0	0.907377
0.45	2043	0.4	7.5	0.9	11.7	1.9	18.1333	0	0.264575	0	0.608276	0	0.907377
0.45	2046	0.4	7.5	0.9	11.7	1.9	18.1	0	0.264575	0	0.608276	0	0.87178
0.45	2049	0.4	7.5	0.9	11.7	1.9	18.1	0	0.264575	0	0.608276	0	0.87178
0.45	2052	0.4	7.5	0.9	11.7	1.9	18.1	0	0.264575	0	0.608276	0	0.87178
0.45	2055	0.4	7.46667	0.9	11.7	1.9	18.1	0	0.305505	0	0.608276	0	0.87178
0.45	2058	0.4	7.5	0.9	11.7	1.9	18.1	0	0.264575	0	0.608276	0	0.87178
0.45	2061	0.4	7.5	0.9	11.7	1.9	18.1	0	0.264575	0	0.608276	0	0.87178
0.45	2064	0.4	7.5	0.9	11.7	1.9	18.1	0	0.264575	0	0.608276	0	0.87178
0.45	2067	0.4	7.5	0.9	11.7	1.9	18.1333	0	0.264575	0	0.608276	0	0.907377
0.45	2070	0.4	7.5	0.9	11.7	1.9	18.1	0	0.264575	0	0.608276	0	0.87178
0.45	2073	0.4	7.5	0.9	11.7	1.9	18.1	0	0.264575	0	0.608276	0	0.87178
0.45	2076	0.4	7.5	0.9	11.7	1.9	18.1	0	0.264575	0	0.608276	0	0.87178
0.45	2079	0.4	7.5	0.9	11.7	1.9	18.1333	0	0.264575	0	0.608276	0	0.907377
0.45	2082	0.4	7.5	0.9	11.7	1.9	18.1	0	0.264575	0	0.608276	0	0.87178
0.45	2085	0.4	7.5	0.9	11.7	1.9	18.1333	0	0.264575	0	0.608276	0	0.907377
0.45	2088	0.4	7.5	0.9	11.7	1.9	18.1	0	0.264575	0	0.608276	0	0.87178
0.45	2091	0.4	7.5	0.9	11.7	1.9	18.1	0	0.264575	0	0.608276	0	0.87178
0.45	2094	0.4	7.5	0.9	11.7	1.9	18.1	0	0.264575	0	0.608276	0	0.87178
0.45	2097	0.4	7.46667	0.9	11.7	1.9	18.1	0	0.305505	0	0.608276	0	0.87178
0.45	2100	0.4	7.5	0.9	11.7	1.9	18.1	0	0.264575	0	0.608276	0	0.87178
0.45	2103	0.4	7.5	0.9	11.7	1.9	18.1	0	0.264575	0	0.608276	0	0.87178
0.45	2106	0.4	7.46667	0.9	11.7	1.9	18.1	0	0.305505	0	0.608276	0	0.87178
0.45	2109	0.4	7.5	0.9	11.7	1.9	18.1	0	0.264575	0	0.608276	0	0.87178
0.45	2112	0.4	7.5	0.9	11.6667	1.9	18.1	0	0.264575	0	0.57735	0	0.87178
0.45	2115	0.4	7.5	0.9	11.7	1.9	18.1	0	0.264575	0	0.608276	0	0.87178
0.45	2118	0.4	7.5	0.9	11.6667	1.9	18.1333	0	0.264575	0	0.57735	0	0.907377
0.45	2121	0.4	7.5	0.9	11.6667	1.9	18.0667	0	0.264575	0	0.57735	0	0.85049
0.45	2124	0.4	7.5	0.9	11.6667	1.9	18.1333	0	0.264575	0	0.57735	0	0.907377
0.45	2127	0.4	7.5	0.9	11.6667	1.9	18.1333	0	0.264575	0	0.57735	0	0.814453
0.45	2130	0.4	7.5	0.9	11.6667	1.9	18.1333	0	0.264575	0	0.57735	0	0.814453
0.45	2133	0.4	7.5	0.9	11.6667	1.9	18.1	0	0.264575	0	0.57735	0	0.87178
0.45	2136	0.4	7.5	0.9	11.6667	1.9	18.1	0	0.264575	0	0.57735	0	0.87178
0.45	2139	0.4	7.46667	0.9	11.6667	1.9	18.1	0	0.305505	0	0.57735	0	0.87178
0.45	2142	0.4	7.5	0.9	11.6667	1.9	18.1	0	0.264575	0	0.57735	0	0.87178
0.45	2145	0.4	7.5	0.9	11.6667	1.9	18.1333	0	0.264575	0	0.57735	0	0.814453
0.45	2148	0.4	7.5	0.9	11.6667	1.9	18.1	0	0.264575	0	0.57735	0	0.87178
0.45	2151	0.4	7.5	0.9	11.6667	1.9	18.1	0	0.264575	0	0.57735	0	0.87178
0.45	2154	0.4	7.5	0.9	11.6667	1.9	18.1	0	0.264575	0	0.57735	0	0.793725
0.45	2157	0.4	7.5	0.9	11.6667	1.9	18.1	0	0.264575	0	0.57735	0	0.87178
0.45	2160	0.4	7.5	0.9	11.6667	1.9	18.1	0	0.264575	0	0.57735	0	0.87178
0.45	2163	0.4	7.46667	0.9	11.6667	1.9	18.0667	0	0.305505	0	0.57735	0	0.85049
0.45	2166	0.4	7.46667	0.9	11.6667	1.9	18.0667	0	0.305505	0	0.57735	0	0.85049
0.45	2169	0.4	7.46667	0.9	11.6667	1.9	18.0667	0	0.305505	0	0.57735	0	0.85049
0.45	2172	0.4	7.46667	0.9	11.6667	1.9	18.0667	0	0.305505	0	0.57735	0	0.85049
0.45	2175	0.4	7.46667	0.9	11.6667	1.9	18.0667	0	0.305505	0	0.57735	0	0.85049
0.45	2178	0.4	7.46667	0.9	11.6667	1.9	18.0667	0	0.305505	0	0.57735	0	0.85049
0.45	2181	0.4	7.43333	0.9	11.6667	1.9	18.0667	0	0.321455	0	0.57735	0	0.85049
0.45	2184	0.4	7.46667	0.9	11.7	1.9	18.1	0	0.305505	0	0.519615	0	0.87178
0.45	2187	0.4	7.43333	0.9	11.6667	1.9	18.0667	0	0.321455	0	0.57735	0	0.85049
0.45	2190	0.4	7.43333	0.9	11.6667	1.9	18.0333	0	0.321455	0	0.57735	0	0.814453
0.45	2193	0.4	7.43333	0.9	11.6667	1.9	18.0667	0	0.321455	0	0.57735	0	0.85049
0.45	2196	0.4	7.43333	0.9	11.6667	1.9	18.0667	0	0.321455	0	0.57735	0	0.85049
0.45	2199	0.4	7.43333	0.9	11.6667	1.9	18.0333	0	0.321455	0	0.57735	0	0.814453
0.45	2202	0.4	7.43333	0.9	11.6667	1.9	18.0333	0	0.321455	0	0.57735	0	0.814453
0.45	2205	0.4	7.43333	0.9	11.6667	1.9	18.0333	0	0.321455	0	0.57735	0	0.814453
0.45	2208	0.4	7.43333	0.9	11.6667	1.9	18.0333	0	0.321455	0	0.57735	0	0.814453
0.45	2211	0.4	7.43333	0.9	11.6667	1.9	18.0667	0	0.321455	0	0.57735	0	0.85049
0.45	2214	0.4	7.43333	0.9	11.6667	1.9	18.0333	0	0.321455	0	0.57735	0	0.896289
0.45	2217	0.4	7.43333	0.9	11.6667	1.9	18.0667	0	0.321455	0	0.57735	0	0.929157
0.45	2220	0.4	7.43333	0.9	11.6667	1.9	18.0333	0	0.321455	0	0.57735	0	0.896289
0.45	2223	0.4	7.43333	0.9	11.6667	1.9	18.0333	0	0.321455	0	0.57735	0	0.896289
0.45	2226	0.4	7.43333	0.9	11.6667	1.9	18.0333	0	0.321455	0	0.57735	0	0.896289
0.45	2229	0.4	7.43333	0.9	11.6667	1.9	18.0333	0	0.321455	0	0.57735	0	0.896289
0.45	2232	0.4	7.43333	0.9	11.7	1.9	18.0667	0	0.321455	0	0.519615	0	0.929157
0.45	2235	0.4	7.43333	0.9	11.6667	1.9	18.0667	0	0.321455	0	0.57735	0	0.929157
0.45	2238	0.4	7.43333	0.9	11.6667	1.9	18.0333	0	0.321455	0	0.57735	0	0.896289
0.45	2241	0.4	7.43333	0.9	11.7	1.9	18.0667	0	0.321455	0	0.519615	0	0.929157
0.45	2244	0.4	7.43333	0.9	11.6667	1.9	18.0333	0	0.321455	0	0.57735	0	0.896289
0.45	2247	0.4	7.43333	0.9	11.6667	1.9	18.0667	0	0.321455	0	0.57735	0	0.929157
0.45	2250	0.4	7.4	0.9	11.7	1.9	18.0333	0	0.264575	0	0.519615	0	0.896289
0.45	2253	0.4	7.4	0.9	11.6667	1.9	18.0667	0	0.264575	0	0.57735	0	0.929157
0.45	2256	0.4	7.4	0.9	11.6667	1.9	18.0333	0	0.264575	0	0.57735	0	0.896289
0.45	2259	0.4	7.4	0.9	11.6667	1.9	18.0333	0	0.264575	0	0.57735	0	0.896289
0.45	2262	0.4	7.4	0.9	11.6667	1.9	18.0333	0	0.264575	0	0.57735	0	0.896289
0.45	2265	0.4	7.4	0.9	11.6667	1.9	18.0333	0	0.264575	0	0.57735	0	0.896289
0.45	2268	0.4	7.4	0.9	11.7	1.9	18.0333	0	0.264575	0	0.608276	0	0.896289
0.45	2271	0.4	7.4	0.9	11.6667	1.9	18.0333	0	0.264575	0	0.57735	0	0.896289
0.45	2274	0.4	7.4	0.9	11.6667	1.9	18.0333	0	0.264575	0	0.57735	0	0.896289
0.45	2277	0.4	7.4	0.9	11.6667	1.9	18.0333	0	0.264575	0	0.57735	0	0.896289
0.45	2280	0.4	7.4	0.9	11.6667	1.9	18.0333	0	0.264575	0	0.57735	0	0.896289
0.45	2283	0.4	7.4	0.9	11.6667	1.9	18.0333	0	0.264575	0	0.585947	0	0.896289
0.45	2286	0.4	7.4	0.9	11.6667	1.9	18.0333	0	0.264575	0	0.585947	0	0.896289
0.45	2289	0.4	7.4	0.9	11.7	1.9	18.0667	0	0.264575	0	0.608276	0	0.929157
0.45	2292	0.4	7.4	0.9	11.6667	1.9	18.0667	0	0.264575	0	0.57735	0	0.929157
0.45	2295	0.4	7.4	0.9	11.6667	1.9	18.0667	0	0.264575	0	0.585947	0	0.929157
0.45	2298	0.4	7.36667	0.9	11.6333	1.9	18.0667	0	0.208167	0	0.550757	0	0.929157
0.45	2301	0.4	7.4	0.9	11.6667	1.9	18.0667	0	0.264575	0	0.585947	0	0.929157
0.45	2304	0.4	7.4	0.9	11.7	1.9	18.0667	0	0.264575	0	0.608276	0	0.929157
0.45	2307	0.4	7.36667	0.9	11.6333	1.9	18.0667	0	0.208167	0	0.550757	0	0.929157
0.45	2310	0.4	7.36667	0.9	11.6667	1.9	18.0667	0	0.208167	0	0.585947	0	0.929157
0.45	2313	0.4	7.33333	0.9	11.6667	1.9	18.0667	0	0.152753	0	0.585947	0	0.929157
0.45	2316	0.4	7.43333	0.9	11.7	1.9	18.0333	0	0.321455	0	0.608276	0	0.896289
0.45	2319	0.4	7.43333	0.9	11.7	1.9	18.0667	0	0.321455	0	0.608276	0	0.929157
0.45	2322	0.4	8.03333	0.9	11.7	1.9	18.0333	0	1.35769	0	0.608276	0	0.907377
0.45	2325	0.4	7.93333	0.9	11.6667	1.9	18.0333	0	1.18462	0	0.57735	0	0.907377
0.45	2328	0.4	7.43333	0.9	11.7	1.9	18.0333	0	0.321455	0	0.608276	0	0.907377
0.45	2331	0.4	7.43333	0.9	11.6667	1.9	18.0333	0	0.321455	0	0.57735	0	0.907377
0.45	2334	0.4	7.46667	0.9	11.7	1.9	18.0333	0	0.305505	0	0.608276	0	0.907377
0.45	2337	0.4	7.43333	0.9	11.5667	1.9	18.0333	0	0.321455	0	0.51316	0	0.907377
0.45	2340	0.4	7.43333	0.9	11.7	1.9	18.0333	0	0.321455	0	0.608276	0	0.907377
0.45	2343	0.4	7.5	0.9	11.6667	1.9	18	0	0.3	0	0.57735	0	0.888819
0.45	2346	0.4	7.46667	0.9	11.9	1.9	18.0333	0	0.305505	0	0.8544	0	0.907377
0.45	2349	0.4	7.43333	0.9	11.6667	1.9	19	0	0.321455	0	0.57735	0	2.16564
0.45	2352	0.4	7.66667	0.9	11.6333	1.93333	20.1	0	0.416333	0	0.550757	0.057735	4.15812
0.45	2355	0.4	7.66667	0.9	11.6667	1.9	17.6	0	0.416333	0	0.57735	0	0.6
0.45	2358	0.4	7.43333	0.9	11.6667	1.9	17.9667	0	0.321455	0	0.57735	0	0.873689
0.45	2361	0.4	7.43333	0.9	11.6667	1.86667	18.3667	0	0.321455	0	0.57735	0.057735	1.45029
0.45	2364	0.4	7.46667	0.9	11.6667	1.93333	18.1667	0	0.378594	0	0.57735	0.057735	1.11505
0.45	2367	0.4	7.5	0.9	11.6667	1.9	18.0333	0	0.360555	0	0.57735	0	0.981495
0.45	2370	0.4	7.5	0.9	11.6667	1.9	18.0667	0	0.360555	0	0.57735	0	1.0116
0.45	2373	0.4	7.53333	0.9	11.7333	1.9	18.1333	0	0.416333	0	0.46188	0	1.09697
0.45	2376	0.4	7.5	0.9	11.7333	1.9	18.1667	0	0.360555	0	0.46188	0	1.11505
0.45	2379	0.4	7.53333	0.9	11.7667	1.9	18.1333	0	0.416333	0	0.493288	0	1.09697
0.45	2382	0.4	7.53333	0.9	11.8	1.9	18.1333	0	0.351188	0	0.52915	0	1.09697
0.45	2385	0.4	7.56667	0.9	11.8	1.9	18.1333	0	0.404145	0	0.52915	0	1.09697
0.45	2388	0.4	7.7	0.9	12.1	1.9	18.75	0	0.424264	0	0.141421	0	0.353553
0.45	2391	0.4	7.7	0.9	12.1	1.9	18.75	0	0.424264	0	0.141421	0	0.353553
0.45	2394	0.4	7.7	0.9	12.1	1.9	18.75	0	0.424264	0	0.141421	0	0.353553
0.45	2397	0.4	7.75	0.9	12.1	1.9	18.8	0	0.353553	0	0.141421	0	0.282843
0.45	2400	0.4	7.65	0.9	12.1	1.9	18.75	0	0.353553	0	0.141421	0	0.353553
0.46628	1200	0.400042	7.2563	0.902538	11.6294	1.89925	18.5922	7.20787e-05	0.222642	0.00497343	0.590262	0.00187405	0.608282
0.0131963	694.119	0.00117778	0.225025	0.0309649	0.287752	0.0126708	0.524969	0.00203997	0.155261	0.0535823	0.365133	0.0219047	0.27594
